# Supplementary material
Source: PubMed Central journal article supplement (PMC2951229)
Supplement: supp_M110.121095_jbc.M110.121095-1.pdf [file supp_M110.121095_jbc.M110.121095-1.pdf]

## SUPPLEMENTARY TEXT:

### ESTIMATION OF METABOLIC FLUXES USING ISOTOPOMER BALANCING AND VALIDITY OF METABOLIC AND ISOTOPIC STEADY STATE ASSUMPTION

#### Estimation of Metabolic Fluxes Using Isotopomer Balancing

When a substrate is processed through the metabolic pathways of an organism, a variety of reactions take place to generate energy, reducing power and biomass precursors. These reactions may involve carbon-carbon bond breakage or formation. If a mixture of labeled and unlabeled substrate molecules is processed, these bond breakages and formations may lead to unique distributions of isotope isomers (isotopomers) for each intermediate metabolite, which in turn is determined by the *in vivo* fluxes (illustrated in Fig. 4). Therefore, *in vivo* fluxes may be deduced from the labeling pattern of the intermediate metabolites. Since biomass building blocks are formed from precursor metabolites distributed throughout the metabolic pathways of an organism, they serve as storage of the labeling information of the intermediates and hence the metabolic fluxes. Among building blocks, proteinogenic amino acids are commonly used for isotopomer analysis because of two reasons. First, and unlike precursor intermediates, proteinogenic amino acids are abundant and stable. Secondly, since they provide the isotopic labeling information of their central metabolic precursors, their labeling pattern can be used to constrain the central carbon metabolic network model to accurately estimate metabolic fluxes.

The process of estimating metabolic fluxes from isotopomer abundances of proteinogenic amino acids obtained via NMR experiments is illustrated in Supplementary Fig. 1. Cell biomass is harvested once metabolic and isotopic steady state is achieved (see section below for details), NMR samples are prepared, 2D HSQC NMR spectra acquired, the identity of peaks established and the multiplet intensities quantified. These intensities are then used to estimate the fraction of each isotopomer (denoted as isotopomer abundances, see Supplementary Table 2). Since analytical expressions to directly calculate fluxes from isotopomer data do not exist, the computer program NMR2Flux (1) was used to estimate the fluxes. An overview of the algorithm used by this software is also depicted in Supplementary Fig. 1. The software NMR2Flux is supplied with a metabolic network based on known *E. coli* biochemistry (see supplementary Table 1), isotopomer data (see Supplementary Table 2), and flux constraints (based on experimental measurement of extracellular metabolites). Based on the stoichiometry, the program starts with a set of guessed fluxes that satisfies the input constraints and simulates the resulting isotopomer distribution. The program then calculates the error between the simulated and experimental multiplet

intensities: i.e.  $\chi^2 = \sum_{j=1}^P [I_j - I_{xj}]^2$ , where  $I_j$  and  $I_{xj}$  are the  $j$ -th simulated and experimental multiplet

intensities, respectively, out of a total of  $P$  multiplet intensities. If this error is lower than the desired tolerance, the guessed flux set is accepted, otherwise another set of candidate fluxes is guessed and the process is repeated (via a simulated annealing approach). Standard deviations of the fluxes were computed by statistical analysis of the resulting fluxes from 250 simulation runs. A detailed description of the overall process for estimating metabolic fluxes via isotopomer balancing used in our study can be found in the Supplementary Materials IV and VI in Sriram et. al. (1).

## Metabolic and Isotopic Steady State

Metabolic fluxes estimated using isotopomer balancing represent the time-averaged *in vivo* fluxes since the incorporation of labeling at any given time is dependent upon the fluxes at that moment. Therefore, it is important to ensure that the analysis is conducted during a phase of the culture where the metabolic fluxes are constant. The exponential phase of growth during batch cultures provides such a condition as the cells are in a pseudo-steady state: i.e. although the concentrations of substrate, products, and cells are changing with time, the *in vivo* fluxes remain constant (2). This study tested whether the fluxes were indeed constant during the exponential phase.

The flux of a metabolite is given by

$$v = \frac{1}{x} \frac{dM}{dt} \quad (a)$$

where  $v$  is the flux (mmol/g CDW/h),  $x$  is the cell density (g CDW/L),  $M$  is the metabolite concentration (mmol/L), and  $t$  is time (h). The change in cell density due to growth is determined by the specific growth rate,  $\mu$  ( $\text{h}^{-1}$ ), which is defined as:

$$\mu = \frac{1}{x} \frac{dx}{dt} \quad (b)$$

By solving equation (b) for  $x$  and substituting the resulting expression into (a), the following equation is obtained:

$$\frac{dM}{dx} = \frac{v}{\mu} \quad (c)$$

Since  $\mu$  is constant throughout the exponential phase of growth (see Fig. 2), equation (c) indicates that, for a constant flux  $v$ , the plot between  $M$  and  $x$  should be a straight line. The plots shown in supplementary Fig. 2 exhibit a very good fit to a straight line for the extracellular metabolites consumed and generated during the exponential phase by wild type strain MG1655 and mutant Pdh. These results indicate that the extracellular fluxes were indeed constant during exponential growth and thus cultures in this phase can be regarded as pseudo steady state.

The calculation of metabolic fluxes using isotopomer balancing also requires the cellular proteins to be in isotopic steady state. This requirement is met by cultivating cells in metabolic steady state (e.g. exponentially growing cells in a batch culture as discussed above) until the  $^{13}\text{C}$  label is fully propagated throughout metabolism (2). In the batch cultures used in our study, cells precultured on unlabeled glucose were inoculated in a medium containing a mixture of labeled and unlabeled glucose (12.5% U- $^{13}\text{C}$ , 25% 1- $^{13}\text{C}$ , and 62.5% unlabeled). In order to ensure an isotopic steady state, cells were harvested after five generations of exponential growth (i.e. while in metabolic steady state). Although it is widely accepted that five generations are sufficient to achieve isotopic steady state (2), the validity of this criterion under our experimental conditions is verified in what follows.

A batch experiment is typically started with an inoculum precultured on unlabeled glucose (i.e. with natural labeling of carbon atoms). These cells are then inoculated in a medium containing a mixture of labeled and unlabeled glucose to an initial cell concentration  $x_0$  at time  $t_0$ . For analytical purposes, we will assume that the fraction of labeled glucose is  $y$ . As the cells start consuming glucose to synthesize biomass, labeled carbon atoms are incorporated in the same fraction as in the substrate. Since the amount of biomass at any given time ( $x$ ) can be expressed in terms of the number of doublings ( $n$ ) as  $2^n x_0$ , the fraction of labeled carbon atoms ( $f$ ) in the biomass can be given by:

$$f = y \left( 1 - \left( \frac{1}{2^n} \right) \right) \quad (d)$$

Using this expression it can be shown that as  $n \rightarrow \infty$  then  $f \rightarrow y$ , and therefore  $y$  can be regarded as the steady state value of  $f$ . Using the above expression the calculated value of  $f$  after 5 doublings is 96.9% of its steady state value ( $y$ ), and hence the assumption that five doublings are sufficient to achieve isotopic steady state. In our experiments, the cultures were harvested after five doublings. The computer program used to compute intracellular fluxes, NMR2Flux (1), accounts for the labeling pattern of the biomass before inoculation and hence estimates the true constant flux during exponential phase.

#### REFERENCES

1. Sriram, G., Fulton, D. B., Iyer, V. V., Peterson, J. M., Zhou, R., Westgate, M. E., Spalding, M. H., and Shanks, J. V. (2004) *Plant Phys.* **136**,3043-3057.
2. Zamboni, N., Fendt, S-M., Ruhl, M., and Sauer, U. (2009) *Nat. Protoc.* **4**,878-892.

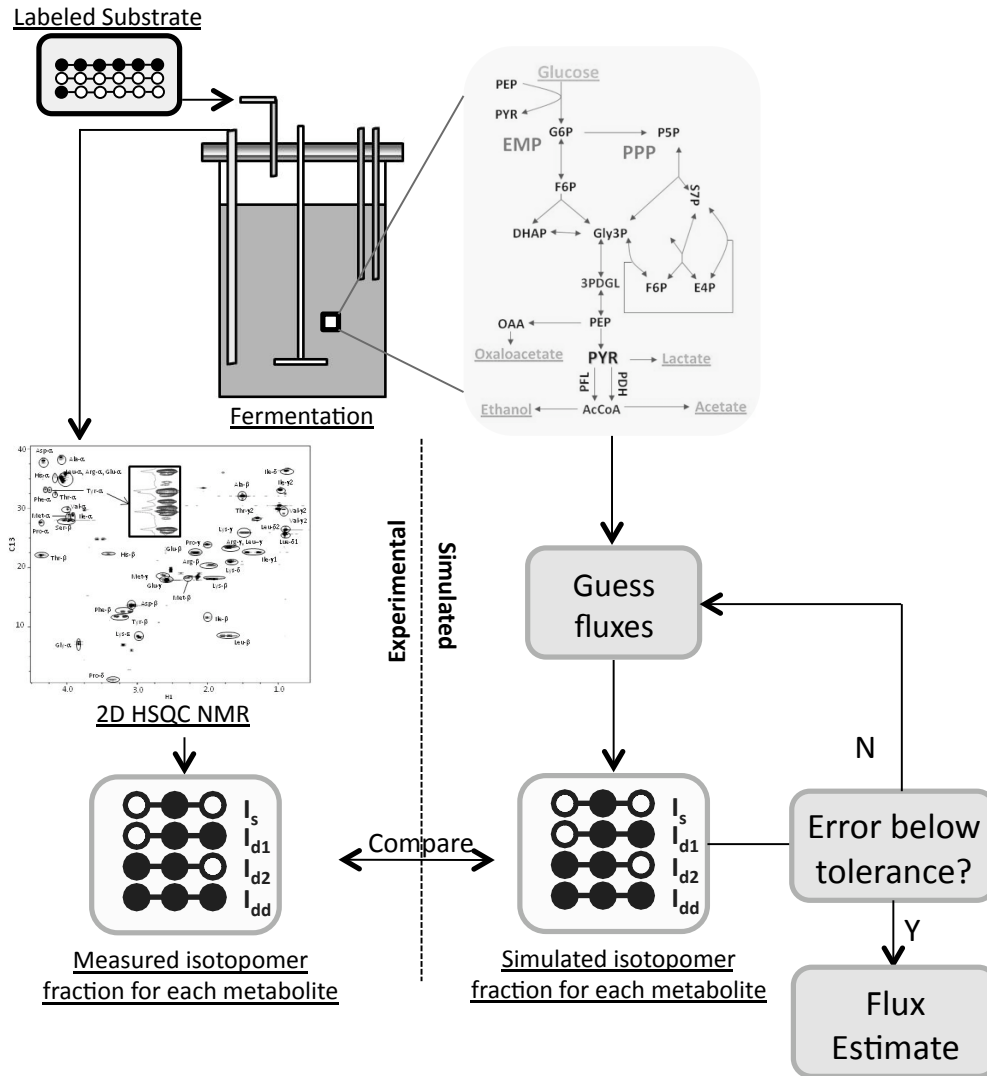

**Supplementary Fig. 1.** An overview of flux estimation using labeled substrate, NMR analysis, and isotopomer balancing. An experimenter cultures an organism on a mixture of labeled (filled circle) and unlabeled (open circle) carbon source, harvest the biomass, obtains 2D [ $^{13}\text{C}$ ,  $^1\text{H}$ ] HSQC spectra and estimates the fraction of each isotopomer, which constitutes experimental data as shown on the left hand side of the Figure. The computer program NMR2FLUX guesses fluxes satisfying the stoichiometry and other user input flux parameters and simulates isotopomer distributions based on the guessed fluxes and known biochemistry. This constitutes the simulated data shown on the right hand side of the Figure. The software then computes the error between simulated and experimental data and follows a simulated annealing protocol to identify the global minimum by adjusting the guessed fluxes. The final guessed set of fluxes at the identified global minimum is the output and represents the *in vivo* fluxes since they satisfy all the constraints as well as the NMR data.

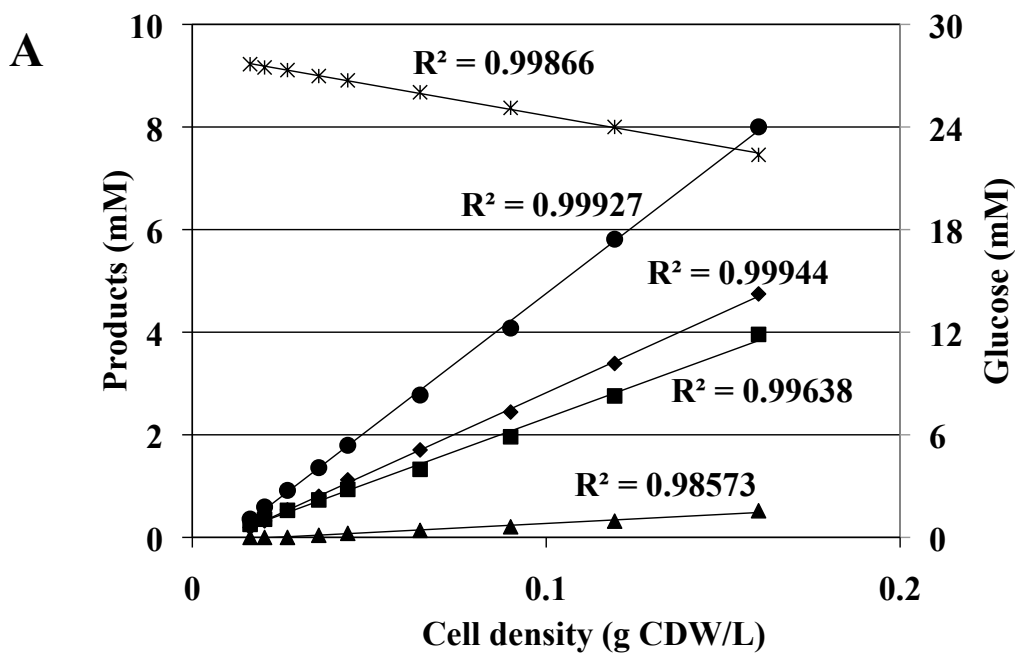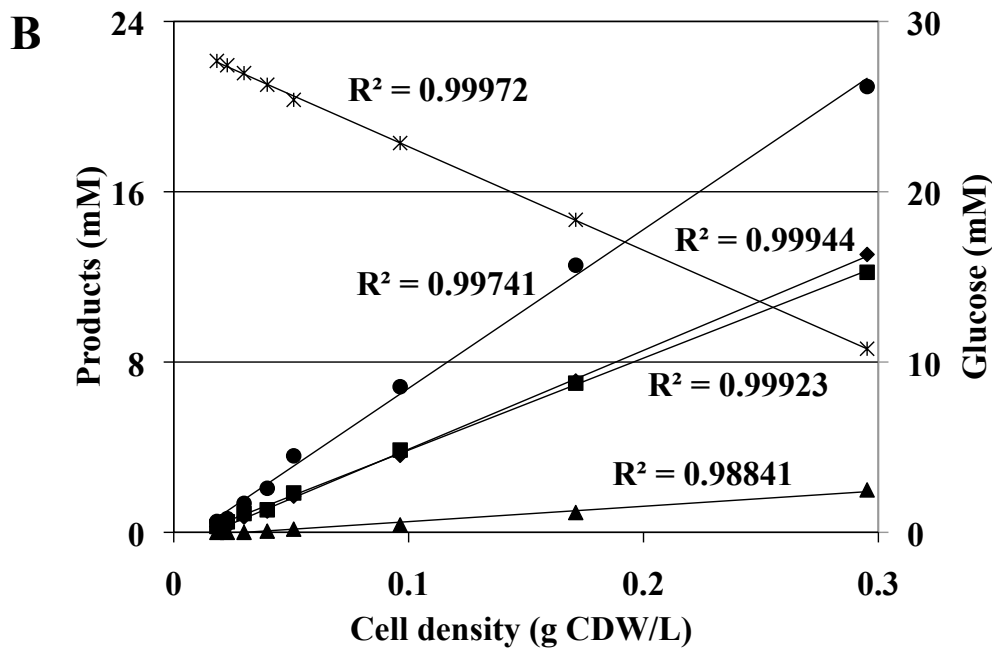

**Supplementary Fig. 2.** Plot of the extracellular metabolite concentrations versus cell density during the exponential phase of growth showing a straight line fit between the two for all the measured metabolites in strains MG1655 (A) and Pdh (B). Symbols are as follows: glucose (asterisks), acetate (squares), ethanol (diamonds), formate (circles), and succinate (triangles).

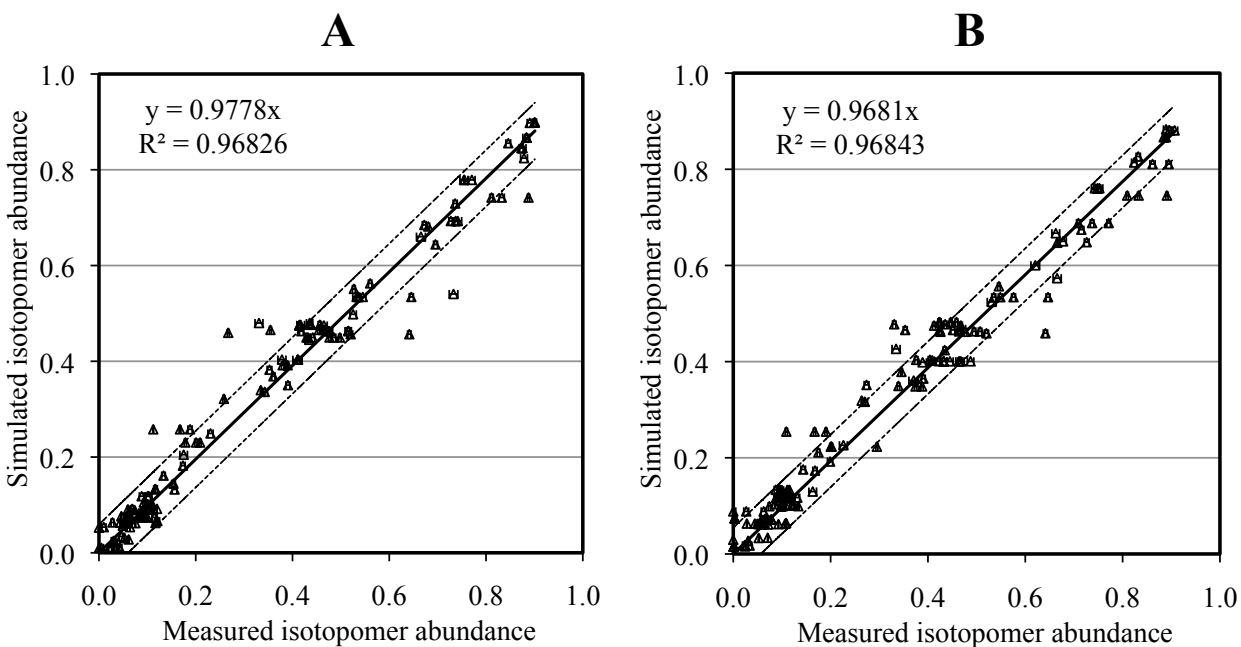

**Supplementary Fig. 3.** Comparison of experimental and simulated isotopomer abundances for strains MG1655 (A) and Pdh (B). The  $x$ -axis represents experimental isotopomer abundances, measured from [ $^{13}\text{C}$ ,  $^1\text{H}$ ] spectra, while the  $y$ -axis represents isotopomer abundances simulated by the computer program NMR2Flux, corresponding to the evaluated fluxes of Fig. 5. Isotopomer abundances are shown as fractions of the corresponding metabolite pool. The thick solid line represents a linear fitting as shown in the equation while the thin dotted lines illustrate the 95% confidence band.

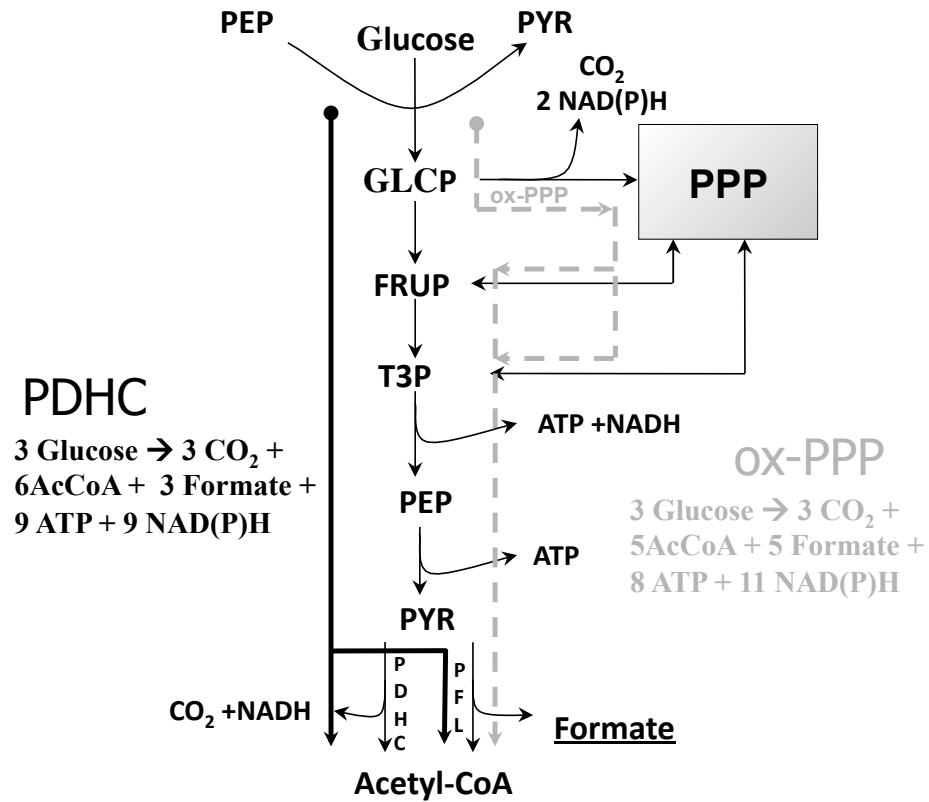

**Supplementary Fig. 4.** Generation of CO<sub>2</sub> by the oxidative branch of the pentose phosphate pathway (ox-PPP) and the pyruvate dehydrogenase complex (PDHC). The stoichiometry of the overall reaction in each pathway is shown, assuming equal CO<sub>2</sub> yields (i.e., generation of the same amount of CO<sub>2</sub> upon consumption of the same amount of glucose).





|     |                                                                                                                                                                                                                                                                                                             |       |       |       |       |         |        |         |        |
|-----|-------------------------------------------------------------------------------------------------------------------------------------------------------------------------------------------------------------------------------------------------------------------------------------------------------------|-------|-------|-------|-------|---------|--------|---------|--------|
| r66 | ATP → ADP                                                                                                                                                                                                                                                                                                   | 7.963 | 0.881 | 6.962 | 0.891 | 152.389 | 16.855 | 150.702 | 19.289 |
|     | <b>Transhydrogenase</b>                                                                                                                                                                                                                                                                                     |       |       |       |       |         |        |         |        |
| r67 | NADH + NADP → NADPH + NAD                                                                                                                                                                                                                                                                                   | 1.505 | 0.372 | 0.336 | 0.101 | 28.794  | 7.113  | 7.270   | 2.197  |
|     | <b>Synthesis of macromolecules elemental units</b>                                                                                                                                                                                                                                                          |       |       |       |       |         |        |         |        |
| r68 | 0.105 UDPG + 0.1578 CDPETN + 0.1578 OHMA + 0.1578 C14:0 + 0.1578 CMPKDO + 0.1578 NHEP + 0.105TGS → LPS <sub>cell</sub>                                                                                                                                                                                      | 0.019 | 0.000 | 0.016 | 0.003 | 0.365   | 0.005  | 0.357   | 0.061  |
| r69 | 0.25 GLY3P + 0.25 SER + 0.5 AVGFAT+2ATP → LIPID <sub>cell</sub> + 2 ADP                                                                                                                                                                                                                                     | 0.059 | 0.001 | 0.051 | 0.009 | 1.120   | 0.016  | 1.093   | 0.186  |
| r70 | 0.0960 ALA + 0.0553 ARG + 0.0451 ASN + 0.0451 ASP + 0.0171 CYS + 0.0492 GLN + 0.0492 GLU + 0.1145 GLY + 0.0177 HIS + 0.0543 ILE + 0.0842 LEU + 0.0641 LYS + 0.0287 MET + 0.0346 PHE + 0.0413 PRO + 0.0403 SER + 0.0474 THR + 0.0106 TRP + 0.0257 TYR + 0.0791 VAL + 4.3 ATP → PROT <sub>cell</sub> + 4.3ADP | 0.567 | 0.008 | 0.490 | 0.083 | 10.854  | 0.152  | 10.597  | 1.802  |
| r71 | 0.2465 DAMP + 0.2535 DCMP + 0.2535 DGMP + 0.2465 DUMP + 5.4 ATP → DNA + 5.4ADP                                                                                                                                                                                                                              | 0.011 | 0.000 | 0.010 | 0.002 | 0.217   | 0.003  | 0.212   | 0.036  |
| r72 | 0.2619 AMP + 0.2 CMP + 0.3222 GMP + 0.2159 UMP + 4.4 ATP → RNA + 4.4ADP                                                                                                                                                                                                                                     | 0.072 | 0.001 | 0.062 | 0.011 | 1.369   | 0.019  | 1.337   | 0.227  |
| r73 | 0.167 UDPNAG + 0.167 UDPNAM + 0.33 ALA + 0.167 DAP + 0.167 GLU + 0.833 ATP → PEPTIDO + 0.833 ADP                                                                                                                                                                                                            | 0.019 | 0.000 | 0.016 | 0.003 | 0.359   | 0.005  | 0.351   | 0.060  |
|     | <b>Synthesis of CELL</b>                                                                                                                                                                                                                                                                                    |       |       |       |       |         |        |         |        |
| r74 | 0.0149 DNA + 0.0201 GLYCOGEN + 0.0768 LIPID <sub>cell</sub> + 0.0250 LPS <sub>cell</sub> + 0.0246 PEPTIDO + 0.7441 PROT <sub>cell</sub> + 0.0939 RNA → CELL                                                                                                                                                 | 0.434 | 0.006 | 3.750 | 0.638 | 8.306   | 0.118  | 81.169  | 13.799 |
|     | <b>Transport reactions</b>                                                                                                                                                                                                                                                                                  |       |       |       |       |         |        |         |        |
| r75 | GLUCOSE <sub>ext</sub> → GLUCOSE                                                                                                                                                                                                                                                                            | 5.225 | 0.364 | 4.620 | 0.423 | 100.000 | 6.966  | 100.000 | 9.152  |
| r76 | LAC → LAC <sub>ext</sub>                                                                                                                                                                                                                                                                                    | 0.048 | 0.037 | 0.051 | 0.026 | 0.918   | 0.700  | 1.108   | 0.570  |
| r77 | FORMATE → FORMATE <sub>ext</sub>                                                                                                                                                                                                                                                                            | 7.622 | 0.666 | 7.592 | 0.550 | 145.864 | 12.741 | 164.330 | 11.914 |
| r78 | AC → AC <sub>ext</sub>                                                                                                                                                                                                                                                                                      | 3.701 | 0.282 | 3.560 | 0.328 | 70.839  | 5.393  | 77.056  | 7.097  |
| r79 | ETOH → ETOH <sub>ext</sub>                                                                                                                                                                                                                                                                                  | 4.564 | 0.320 | 3.990 | 0.230 | 87.345  | 6.132  | 86.370  | 4.971  |
| r80 | SUCC → SUCC <sub>ext</sub>                                                                                                                                                                                                                                                                                  | 0.460 | 0.115 | 0.385 | 0.097 | 8.808   | 0.000  | 8.339   | 0.000  |
| r81 | CO <sub>2</sub> → CO <sub>2ext</sub>                                                                                                                                                                                                                                                                        | 0.805 | 0.087 | 0.245 | 0.104 | 15.405  | 1.657  | 5.304   | 2.259  |

Reaction r21 (underlined) was assumed not to be taking place at pH 7.4.

<sup>a</sup> Normalized fluxes are expressed as the percentage of the glucose uptake flux.

Supplementary Table 1b. Reaction network model and metabolic fluxes calculated using isotopomer balancing<sup>a</sup>

| Rx#                                                 | Stoichiometry                                                                               | Fluxes (isotopomer balancing, normalized) |       |       |       |          |       |       |       |
|-----------------------------------------------------|---------------------------------------------------------------------------------------------|-------------------------------------------|-------|-------|-------|----------|-------|-------|-------|
|                                                     |                                                                                             | MG1655                                    |       |       |       | Pdh      |       |       |       |
|                                                     |                                                                                             | FLUX                                      | SD    | REV   | SD    | FLUX     | SD    | REV   | SD    |
| <b>Glucose uptake</b>                               |                                                                                             |                                           |       |       |       |          |       |       |       |
| r1                                                  | GLUCOSE + PEP → G6P + PYR                                                                   | 100.000                                   | 0.000 |       |       | 100.000  | 0.000 |       |       |
| <b>Embden-Meyerhof-Parnas</b>                       |                                                                                             |                                           |       |       |       |          |       |       |       |
| r2                                                  | G6P → F6P                                                                                   | 96.868                                    | 1.567 | 0.749 | 0.293 | 84.527   | 1.970 | 0.976 | 0.024 |
| r3                                                  | F6P + ATP → 2 T3P + ADP                                                                     | 96.958                                    | 0.522 | 0.681 | 0.111 | 92.889   | 0.657 | 0.892 | 0.078 |
| r4                                                  | T3P + NAD → NADH + 13P2DG                                                                   |                                           |       |       |       |          |       |       |       |
| r5                                                  | 13P2DG + ADP → ATP + 3PDGL                                                                  | 190.234                                   | 0.522 | IRREV | IRREV | 186.309  | 0.657 | IRREV | IRREV |
| r6                                                  | 3PDGL → PEP                                                                                 |                                           |       |       |       |          |       |       |       |
| r7                                                  | PEP + ADP → ATP + PYR                                                                       | 74.427                                    | 1.659 |       |       | 68.877   | 1.627 |       |       |
| <b>Pentose phosphate pathway</b>                    |                                                                                             |                                           |       |       |       |          |       |       |       |
| r8                                                  | G6P + 2 NADP → 2 NADPH + CO <sub>2</sub> + RL5P                                             | 2.705                                     | 1.567 |       |       | 15.056   | 1.970 |       |       |
| r9                                                  | RL5P → R5P                                                                                  | 2.705                                     | 1.567 |       |       | 15.056   | 1.970 |       |       |
| r10                                                 | RL5P → X5P                                                                                  | 2.705                                     | 1.567 |       |       | 15.056   | 1.970 |       |       |
| r11                                                 | R5P + X5P → T3P + S7P                                                                       | 0.509                                     | 0.522 | 0.987 | 0.004 | 4.635    | 0.657 | 0.899 | 0.049 |
| r12                                                 | T3P + S7P → E4P + F6P                                                                       | -0.261                                    | 0.522 | 0.648 | 0.309 | 3.881    | 0.657 | 0.118 | 0.178 |
| r13                                                 | X5P + E4P → F6P + T3P                                                                       | 0.509                                     | 0.522 | 0.981 | 0.015 | 4.635    | 0.657 | 0.918 | 0.066 |
| <b>Glycogen Metabolism</b>                          |                                                                                             |                                           |       |       |       |          |       |       |       |
| r14                                                 | G6P → G1P                                                                                   | 0.016                                     | 0.000 |       |       | 0.014    | 0.000 |       |       |
| r15                                                 | G1P + ATP → ADP + GLYCOGEN                                                                  | 0.016                                     | 0.000 |       |       | 0.014    | 0.000 |       |       |
| <b>Pyruvate dissimilation and fermentation</b>      |                                                                                             |                                           |       |       |       |          |       |       |       |
| r16                                                 | PYR + NADH → NAD + LAC                                                                      | 0.965                                     | 0.101 |       |       | 1.073    | 0.119 |       |       |
| r17                                                 | PYR + COA + NAD → ACCOA + CO <sub>2</sub> + NADH                                            | 21.570                                    | 2.398 |       |       | -        | -     |       |       |
| r18                                                 | PYR + COA → FORMATE + ACCOA                                                                 | 145.846                                   | 2.423 | 0.436 | 0.012 | 161.889  | 1.696 | 0.427 | 0.014 |
| r19                                                 | ACCOA + 2 NADH → 2 NAD + ETOH                                                               | 158.816*                                  | 1.665 |       |       | 153.482* | 1.696 |       |       |
| r20                                                 | ACCOA + ADP → AC + ATP                                                                      |                                           |       |       |       |          |       |       |       |
| r21                                                 | FORMATE → CO <sub>2</sub> + H <sub>2</sub>                                                  | 0.000                                     | 0.000 |       |       | 0.000    | 0.000 |       |       |
| <b>TCA cycle - oxidative and reductive branches</b> |                                                                                             |                                           |       |       |       |          |       |       |       |
| r22                                                 | PEP + CO <sub>2</sub> → OA                                                                  | 14.265                                    | 1.529 | 0.000 | 0.000 | 15.923   | 1.323 | 0.000 | 0.000 |
| r23                                                 | OA + ACCOA + NADP → AKG + COA + NADPH + CO <sub>2</sub>                                     | 2.174                                     | 0.022 | 0.391 | 0.038 | 2.127    | 0.021 | 0.003 | 0.005 |
| r24                                                 | OA + 2 NADH → SUCC + 2 NAD                                                                  | 8.267                                     | 1.529 | 0.313 | 0.267 | 10.056   | 1.323 | 0.431 | 0.308 |
| <b>Biosynthesis of amino acids</b>                  |                                                                                             |                                           |       |       |       |          |       |       |       |
| r25                                                 | OA + NADPH → ASP + NADP                                                                     | 0.490                                     | 0.005 |       |       | 0.480    | 0.005 |       |       |
| r26                                                 | OA + 3 ATP + NADPH → ASN + 3 ADP + NADP                                                     | 0.490                                     | 0.005 |       |       | 0.480    | 0.005 |       |       |
| r27                                                 | AKG + NADPH → GLU + NADP                                                                    | 0.535                                     | 0.005 |       |       | 0.524    | 0.005 |       |       |
| r28                                                 | AKG + ATP + NADPH → GLN + NADP + ADP                                                        | 0.535                                     | 0.005 |       |       | 0.524    | 0.005 |       |       |
| r29                                                 | PYR + NADPH → ALA + NADP                                                                    | 1.044                                     | 0.010 |       |       | 1.022    | 0.010 |       |       |
| r30                                                 | AKG + 7 ATP + NAD + 4 NADPH → ARG + 7 ADP + NADH + 4 NADP                                   | 0.601                                     | 0.006 |       |       | 0.589    | 0.006 |       |       |
| r31                                                 | AKG + ATP + 3 NADPH → PRO + ADP + 3 NADP                                                    | 0.449                                     | 0.004 |       |       | 0.440    | 0.004 |       |       |
| r32                                                 | 2 PYR + ACCOA + NAD + 2 NADPH → LEU + NADH + 2 NADP + 2 CO <sub>2</sub>                     | 0.916                                     | 0.009 |       |       | 0.897    | 0.009 |       |       |
| r33                                                 | 2 PYR + 2 NADPH → VAL + 2 NADP + CO <sub>2</sub>                                            | 0.860                                     | 0.008 |       |       | 0.842    | 0.008 |       |       |
| r34                                                 | OA + PYR + 2 ATP + 5 NADPH → ILE + 5 NADP + 2 ADP + CO <sub>2</sub>                         | 0.591                                     | 0.006 |       |       | 0.578    | 0.006 |       |       |
| r35                                                 | 2 PEP + E4P + ATP + 2 NADPH → PHE + 2 NADP + ADP + CO <sub>2</sub>                          | 0.377                                     | 0.004 |       |       | 0.369    | 0.004 |       |       |
| r36                                                 | 2 PEP + E4P + ATP + NAD + 2 NADPH → TYR + ADP + NADH + 2 NADP + CO <sub>2</sub>             | 0.280                                     | 0.003 |       |       | 0.274    | 0.003 |       |       |
| r37                                                 | PEP + E4P + R5P + 5 ATP + 2 NAD + 3 NADPH → TRP + 5 ADP + 2 NADH + 3 NADP + CO <sub>2</sub> | 0.116                                     | 0.001 |       |       | 0.113    | 0.001 |       |       |
| r38                                                 | R5P + 6 ATP + 3 NAD + NADPH + 1C → HIS + 6 ADP + 3 NADH + NADP                              | 0.193                                     | 0.002 |       |       | 0.189    | 0.002 |       |       |
| r39                                                 | 3 PDGL + NAD + NADPH → SER + NADH + NADP                                                    | 0.439                                     | 0.004 |       |       | 0.429    | 0.004 |       |       |
| r40                                                 | 3 PDGL + NAD + NADPH → GLY + 1C + NADH + NADP                                               | 1.245                                     | 0.012 |       |       | 1.219    | 0.012 |       |       |
| r41                                                 | 3 PDGL + 4 ATP + NAD + NADPH → CYS + 4 ADP + NADH + NADP                                    | 0.186                                     | 0.002 |       |       | 0.182    | 0.002 |       |       |
| r42                                                 | OA + 2 ATP + 3 NADPH → THR + 2 ADP + 3 NADP                                                 | 0.516                                     | 0.005 |       |       | 0.505    | 0.005 |       |       |
| r43                                                 | PYR + OA + 3 ATP + 4 NADPH → LYS + 3 ADP + 4 NADP + CO <sub>2</sub>                         | 0.698                                     | 0.007 |       |       | 0.683    | 0.007 |       |       |
| r44                                                 | OA + 7 ATP + 8 NADPH + 1C → MET + 7 ADP + 8 NADP                                            | 0.312                                     | 0.003 |       |       | 0.306    | 0.003 |       |       |
| <b>Biosynthesis of purines</b>                      |                                                                                             |                                           |       |       |       |          |       |       |       |
| r45                                                 | 3 PDGL + R5P + 9 ATP + 3 NAD + NADPH + 1C → AMP + 9 ADP + 3 NADH + NADP                     | 0.359                                     | 0.003 |       |       | 0.352    | 0.003 |       |       |
| r46                                                 | 3 PDGL + R5P + 11 ATP + 3 NAD + 1C → GMP + 11 ADP + 3 NADH                                  | 0.442                                     | 0.004 |       |       | 0.433    | 0.004 |       |       |
| r47                                                 | 3 PDGL + R5P + 9 ATP + 3 NAD + 2 NADPH + 1C → DAMP + 9 ADP + 3 NADH + 2 NADP                | 0.054                                     | 0.001 |       |       | 0.052    | 0.001 |       |       |
| r48                                                 | 3 PDGL + R5P + 11 ATP + 3 NAD + NADPH + 1C → DGMP + 11 ADP + 3 NADH + NADP                  | 0.055                                     | 0.001 |       |       | 0.054    | 0.001 |       |       |
| <b>Biosynthesis of pyrimidines</b>                  |                                                                                             |                                           |       |       |       |          |       |       |       |
| r49                                                 | OA + P5P + 5 ATP + NADPH → UMP + 5 ADP + NADP                                               | 0.296                                     | 0.003 |       |       | 0.290    | 0.003 |       |       |
| r50                                                 | OA + P5P + 7 ATP + NADPH → CMP + 7 ADP + NADP                                               | 0.274                                     | 0.003 |       |       | 0.269    | 0.003 |       |       |
| r51                                                 | OA + P5P + 5 ATP + 3 NADPH + 1C + 2 NH <sub>3</sub> → DUMP + 5 ADP + 3 NADP                 | 0.054                                     | 0.001 |       |       | 0.052    | 0.001 |       |       |
| r52                                                 | OA + P5P + 7 ATP + 2 NADPH → DCMP + 7 ADP + 2 NADP                                          | 0.055                                     | 0.001 |       |       | 0.054    | 0.001 |       |       |
| <b>1Carbon Metabolism (Formation of 1C)</b>         |                                                                                             |                                           |       |       |       |          |       |       |       |
| r53                                                 | GLY + NAD → 1C + CO <sub>2</sub> + NADH                                                     | 0.100                                     | 0.000 | 0.277 | 0.267 | 0.100    | 0.000 | 0.989 | 0.248 |
| <b>Biosynthesis of lipid components</b>             |                                                                                             |                                           |       |       |       |          |       |       |       |
| r54                                                 | T3P + NADPH → GLY3P + NADP                                                                  | 0.280                                     | 0.003 |       |       | 0.275    | 0.003 |       |       |
| r55                                                 | 8.2 ACCOA + 7.2 ATP + 14 NADPH → AVGFAT + 7.2 ADP + 14 NADP                                 | 0.561                                     | 0.005 |       |       | 0.549    | 0.005 |       |       |
| <b>Biosynthesis of LPS components</b>               |                                                                                             |                                           |       |       |       |          |       |       |       |
| r56                                                 | G6P + ATP → UDPG + ADP                                                                      | 0.039                                     | 0.000 |       |       | 0.038    | 0.000 |       |       |
| r57                                                 | 3 PDGL + 3 ATP + NAD + NADPH → CDPETN + 3 ADP + NADH + NADP                                 | 0.058                                     | 0.001 |       |       | 0.057    | 0.001 |       |       |
| r58                                                 | 7 ACCOA + 6 ATP + 11 NADPH → OHMA + 6 ADP + 11 NADP + 7 COA                                 | 0.058                                     | 0.001 |       |       | 0.057    | 0.001 |       |       |
| r59                                                 | 7 ACCOA + 6 ATP + 12 NADPH → C14:0 + 6A DP + 12 NADP + 7 COA                                | 0.058                                     | 0.001 |       |       | 0.057    | 0.001 |       |       |
| r60                                                 | P5P + PEP + 2 ATP → CMPKDO + 2 ADP                                                          | 0.058                                     | 0.001 |       |       | 0.057    | 0.001 |       |       |
| r61                                                 | 1.5 G6P + ATP + 4 NADP → NHEP + ADP + 4 NADPH                                               | 0.058                                     | 0.001 |       |       | 0.057    | 0.001 |       |       |
| r62                                                 | F6P + 2 ATP + NH <sub>3</sub> → TGSM + 2 ADP                                                | 0.039                                     | 0.000 |       |       | 0.038    | 0.000 |       |       |
| <b>Biosynthesis of peptido components</b>           |                                                                                             |                                           |       |       |       |          |       |       |       |
| r63                                                 | F6P + ACCOA + 3 ATP + NH <sub>3</sub> → UDPNAG + 3 ADP + COA                                | 0.060                                     | 0.001 |       |       | 0.059    | 0.001 |       |       |
| r64                                                 | F6P + PEP + ACCOA + 4 ATP + NADPH + NH <sub>3</sub> → UDPNAM + 4 ADP + NADP + COA           | 0.060                                     | 0.001 |       |       | 0.059    | 0.001 |       |       |

|                                                    |                                                                                                                                                                                                                                                                                                             |           |       |           |       |
|----------------------------------------------------|-------------------------------------------------------------------------------------------------------------------------------------------------------------------------------------------------------------------------------------------------------------------------------------------------------------|-----------|-------|-----------|-------|
| r65                                                | OA + PYR + 2 ATP + 3 NADPH + 2 NH3 → DAP + 2 ADP + 3 NADP                                                                                                                                                                                                                                                   | 0.060     | 0.001 | 0.059     | 0.001 |
| <b>ATP maintenance</b>                             |                                                                                                                                                                                                                                                                                                             |           |       |           |       |
| r66                                                | ATP → ADP                                                                                                                                                                                                                                                                                                   | ND        | ND    | ND        | ND    |
| <b>Transhydrogenase</b>                            |                                                                                                                                                                                                                                                                                                             |           |       |           |       |
| r67                                                | NADH + NADP → NADPH + NAD                                                                                                                                                                                                                                                                                   | 25.800    |       | 0.535     |       |
| <b>Synthesis of macromolecules elemental units</b> |                                                                                                                                                                                                                                                                                                             |           |       |           |       |
| r68                                                | 0.105 UDPG + 0.1578 CDPETN + 0.1578 OHMA + 0.1578 C14:0 + 0.1578 CMPKDO + 0.1578 NHEP + 0.105TGSM → LPS <sub>cell</sub>                                                                                                                                                                                     | 0.366     | 0.004 | 0.358     | 0.003 |
| r69                                                | 0.25 GLY3P + 0.25 SER + 0.5 AVGFAT+2ATP → LIPID <sub>cell</sub> + 2 ADP                                                                                                                                                                                                                                     | 1.122     | 0.011 | 1.098     | 0.011 |
| r70                                                | 0.0960 ALA + 0.0553 ARG + 0.0451 ASN + 0.0451 ASP + 0.0171 CYS + 0.0492 GLN + 0.0492 GLU + 0.1145 GLY + 0.0177 HIS + 0.0543 ILE + 0.0842 LEU + 0.0641 LYS + 0.0287 MET + 0.0346 PHE + 0.0413 PRO + 0.0403 SER + 0.0474 THR + 0.0106 TRP + 0.0257 TYR + 0.0791 VAL + 4.3 ATP → PROT <sub>cell</sub> + 4.3ADP | 10.872    | 0.104 | 10.644    | 0.102 |
| r71                                                | 0.2465 DAMP + 0.2535 DCMP + 0.2535 DGMP + 0.2465 DUMP + 5.4 ATP → DNA + 5.4ADP                                                                                                                                                                                                                              | 0.217     | 0.002 | 0.213     | 0.002 |
| r72                                                | 0.2619 AMP + 0.2 CMP + 0.3222 GMP + 0.2159 UMP + 4.4 ATP → RNA + 4.4ADP                                                                                                                                                                                                                                     | 1.372     | 0.013 | 1.343     | 0.013 |
| r73                                                | 0.167 UDPNAG + 0.167 UDPNAM + 0.33 ALA + 0.167 DAP + 0.167 GLU + 0.833 ATP → PEPTIDO + 0.833 ADP                                                                                                                                                                                                            | 0.360     | 0.003 | 0.352     | 0.003 |
| <b>Synthesis of CELL</b>                           |                                                                                                                                                                                                                                                                                                             |           |       |           |       |
| r74                                                | 0.0149 DNA + 0.0201 GLYCOGEN + 0.0768 LIPID <sub>cell</sub> + 0.0250 LPS <sub>cell</sub> + 0.0246 PEPTIDO + 0.7441 PROT <sub>cell</sub> + 0.0939 RNA → CELL                                                                                                                                                 | 8.335     | 0.080 | 8.160     | 0.078 |
| <b>Transport reactions</b>                         |                                                                                                                                                                                                                                                                                                             |           |       |           |       |
| r75                                                | GLUCOSE <sub>ext</sub> → GLUCOSE                                                                                                                                                                                                                                                                            | 100.000   | 0.000 | 100.000   | 0.000 |
| r76                                                | LAC → LAC <sub>ext</sub>                                                                                                                                                                                                                                                                                    | 0.965     | 0.101 | 1.073     | 0.119 |
| r77                                                | FORMATE → FORMATE <sub>ext</sub>                                                                                                                                                                                                                                                                            | 145.846   | 2.423 | 161.889   | 1.696 |
| r78                                                | AC → AC <sub>ext</sub>                                                                                                                                                                                                                                                                                      | 158.816** | 1.665 | 153.482** | 1.696 |
| r79                                                | ETOH → ETOH <sub>ext</sub>                                                                                                                                                                                                                                                                                  |           |       |           |       |
| r80                                                | SUCC → SUCC <sub>ext</sub>                                                                                                                                                                                                                                                                                  | 8.267     | 2.226 | 10.056    | 2.325 |
| r81                                                | CO2 → CO2 <sub>ext</sub>                                                                                                                                                                                                                                                                                    | 12.285    | 4.027 | 1.361     | 2.059 |

Reaction r21 (underlined) was assumed not to be taking place at pH 7.4.

\* Fluxes were normalized and expressed as the percentage of the glucose uptake flux. The transhydrogenase flux (r67) was calculated based on estimated fluxes for reactions consuming and generating NAD(P)H and assuming redox balanced conditions.

\* Isotopomer balancing does not differentiate between ethanol and acetate since there are no measurable carbon backbone rearrangement between the two metabolites. Hence, the reported flux is a sum of flux generating these metabolites.

## Metabolites

| Abbreviation      | Description (Reference)                                                                   |
|-------------------|-------------------------------------------------------------------------------------------|
| 1C                | 1 carbon carrier with methyl group                                                        |
| 13P2DG            | 1,3-P-D glycerate                                                                         |
| 3PDGL             | 3-Phospho-D-Glycerate                                                                     |
| AC                | Acetate                                                                                   |
| <b>ACext</b>      | <b>Extracellular Acetate</b>                                                              |
| ACCOA             | Acetyl Coenzyme A                                                                         |
| AKG               | $\alpha$ -Ketoglutarate                                                                   |
| ALA               | Alanine                                                                                   |
| AMP               | Adenosine monophosphate                                                                   |
| ARG               | Arginine                                                                                  |
| ASN               | Asparagine                                                                                |
| ASP               | Aspartate                                                                                 |
| ATP               | Adenosine triphosphate                                                                    |
| AVGFAT            | Average fatty acid molecule (3, 4, 6)                                                     |
| C14:0             | Myristic acid                                                                             |
| CDPETN            | CDP-Ethanolamine                                                                          |
| <b>CELL</b>       | <b>Average cell with composition corresponding to a molecular weight of 143 (3, 4, 6)</b> |
| CMP               | Cytidine monophosphate                                                                    |
| CMPKDO            | CMP-2-Keto-3-deoxyoctanoate                                                               |
| CO2               | Carbon dioxide                                                                            |
| <b>CO2ext</b>     | <b>Extracellular Carbon dioxide</b>                                                       |
| CYS               | Cysteine                                                                                  |
| DAMP              | Deoxyadenosine monophosphate                                                              |
| DAP               | Diaminopimelate                                                                           |
| DCMP              | Deoxycytidine monophosphate                                                               |
| DGMP              | 2-Deoxy-guanosine-5-phosphate                                                             |
| DNA               | Average DNA-bound nucleic acid (mol. wt. 309.38) (3, 4, 6)                                |
| DUMP              | Deoxyuridine monophosphate                                                                |
| E4P               | Erythrose 4-phosphate                                                                     |
| ETOH              | Ethanol                                                                                   |
| <b>ETOHext</b>    | <b>Extracellular Ethanol</b>                                                              |
| F6P               | Fructose 6-phosphate                                                                      |
| FORMATE           | Formate                                                                                   |
| <b>FORMATEext</b> | <b>Extracellular Formate</b>                                                              |
| G1P               | Glucose 1-phosphate                                                                       |
| G6P               | Glucose 6-phosphate                                                                       |
| GLN               | Glutamine                                                                                 |
| GLU               | Glutamate                                                                                 |
| GLY               | Glycine                                                                                   |
| GLUCOSE           | Glucose                                                                                   |
| <b>GLUCOSEext</b> | <b>Extracellular Glucose</b>                                                              |
| GLYCOGEN          | Glycogen                                                                                  |
| GLY3P             | Glycerol-3-phosphate                                                                      |
| GMP               | Guanosine monophosphate                                                                   |
| HIS               | Histidine                                                                                 |
| ILE               | Isoleucine                                                                                |
| LAC               | Lactate                                                                                   |
| <b>LACext</b>     | <b>Extracellular Lactate</b>                                                              |
| LEU               | Leucine                                                                                   |
| LIPIDcell         | Average LIPID building block (MW 176) (3, 4, 6)                                           |
| LPScell           | Average Liposaccharide building block (MW 202) (3, 4, 6)                                  |

|                |                                                         |
|----------------|---------------------------------------------------------|
| LYS            | Lysine                                                  |
| MET            | Methionine                                              |
| NADH           | Nicotinamide adenine dinucleotide                       |
| NADPH          | Nicotinamide adenine dinucleotide phosphate             |
| NHEP           | Heptulose                                               |
| OA             | Oxaloacetate                                            |
| OHMA           | Myristic acid                                           |
| PEP            | Phosphoenolpyruvate                                     |
| PEPTIDO        | Average Peptidoglycan building block (MW 151) (3, 4, 6) |
| PHE            | Phenylalanine                                           |
| PRO            | Proline                                                 |
| PROTcell       | Average proteinogenic amino acid (MW 110) (3, 4, 6)     |
| PYR            | Pyruvate                                                |
| RL5P           | Ribulose 5-phosphate                                    |
| R5P            | Ribose-5-phosphate                                      |
| RNA            | Average RNA bound nucleic acid (MW 325) (3, 4, 6)       |
| S7P            | Sedoheptulose-7-P                                       |
| SER            | Serine                                                  |
| SUCC           | Succinate                                               |
| <b>SUCCext</b> | <b>Extracellular Succinate</b>                          |
| T3P            | Glyceraldehyde-3-phosphate/Dihydroxyacetone-3-phosphate |
| TGSM           | Glucosamine                                             |
| THR            | Threonine                                               |
| TRP            | Tryptophan                                              |
| TYR            | Tyrosine                                                |
| UDPG           | UDP-Glucose                                             |
| UDPNAG         | UDP N-acetyl glucosamine                                |
| UDPNAM         | UDP-N-acetyl-D-muramate                                 |
| UMP            | Uridine monophosphate                                   |
| VAL            | Valine                                                  |
| X5P            | Xylose-5-Phosphate                                      |

Extracellular metabolites are shown in yellow

#### REFERENCES

- 1 **Neidhardt F C, Curtiss III R, Ingraham J L, Lin E C C, Low K B, Magasanik B, Reznikoff W S, Riley M, Schaechter M, Umberger H E. , editors.** 1996. *Escherichia coli* and *Salmonella*: cellular and molecular biology. 2nd ed. ASM Press, Washington, D.C.
- 2 **Keseler, I. M., J. Collado-Vides, S. Gama-Castro, J. Ingraham, S. Paley, I. T. Paulsen, M. Peralta-Gil, and P. D. Karp.** 2005. EcoCyc: a comprehensive database resource for *Escherichia coli*. *Nucleic Acids Res.* **33**:(Database issue)D334-D337.
- 3 **Neidhardt, F. C., J. Ingraham, and M. Schaechter.** 1990. *Physiology of the bacterial cell.* Sinauer Associates, Sunderland, MA, USA.
- 5 **Pramanik, J. and J.D. Keasling.** 1997. A stoichiometric model of *Escherichia coli* metabolism: incorporation of growth-rate dependent biomass composition and mechanistic energy requirements. *Biotech. Bioeng.* **56**:398-421.
- 6 **Stephanopoulos, G., A. A. Aristidou, and J. Nielsen.** 1998. *Metabolic Engineering: principles and methodology.* Academic Press, CA, USA.
- 7 **Stryer, L.** 1995. *Biochemistry.* Freeman, New York, USA.

**Supplementary Table 2. Isotopomer abundances of intracellular precursor metabolites in MG1655 and Pdh grown on a mixture of labeled and unlabeled glucose (12.5% U-13C, 25%1-13C , 62.5% unlabeled )<sup>a</sup>.**

| Nucleus    | Precursor | Carbon backbone of the precursor leading to isotopomer fraction | MG1655       |       | PDH-  |       |
|------------|-----------|-----------------------------------------------------------------|--------------|-------|-------|-------|
|            |           |                                                                 | Mean         | SD    | Mean  | SD    |
| Ala-a (s)  | PYR       | 123                                                             | 0.074        | 0.013 | 0.074 | 0.013 |
| Ala-a (d1) | PYR       | 123                                                             | 0.023        | 0.013 | 0.024 | 0.013 |
| Ala-a (d2) | PYR       | 123                                                             | 0.343        | 0.013 | 0.371 | 0.013 |
| Ala-a (dd) | PYR       | 123                                                             | 0.560        | 0.013 | 0.531 | 0.013 |
| Ala-b (s)  | PYR       | 123                                                             | 0.533        | 0.010 | 0.576 | 0.006 |
| Ala-b (d)  | PYR       | 123                                                             | 0.468        | 0.010 | 0.424 | 0.006 |
| Arg-b (s)  | AKG       | x234x                                                           | 0.058        | 0.013 | 0.062 | 0.014 |
| Arg-b (d)  | AKG       | x234x + x234x                                                   | 0.742        | 0.013 | 0.737 | 0.014 |
| Arg-b (t)  | AKG       | x234x                                                           | 0.201        | 0.013 | 0.200 | 0.014 |
| Arg-d (s)  | AKG       | xx345                                                           | 0.100        | 0.005 | 0.104 | 0.007 |
| Arg-d (d)  | AKG       | xx345                                                           | 0.900        | 0.005 | 0.896 | 0.007 |
| Asx-a (s)  | OAA       | 123x                                                            | 0.102        | 0.012 | 0.121 | 0.014 |
| Asx-a (d1) | OAA       | 123x                                                            | 0.042        | 0.012 | 0.025 | 0.014 |
| Asx-a (d2) | OAA       | 123x                                                            | 0.101        | 0.012 | 0.112 | 0.014 |
| Asx-a (dd) | OAA       | 123x                                                            | 0.755        | 0.012 | 0.743 | 0.014 |
| Asx-b (s)  | OAA       | x234                                                            | 0.442        | 0.005 | 0.468 | 0.006 |
| Asx-b (d1) | OAA       | x234                                                            | 0.380        | 0.005 | 0.339 | 0.006 |
| Asx-b (d2) | OAA       | x234                                                            | 0.086        | 0.005 | 0.100 | 0.006 |
| Asx-b (dd) | OAA       | x234                                                            | 0.092        | 0.005 | 0.093 | 0.006 |
| Glx-a (s)  | AKG       | 123xx                                                           | Not observed |       | 0.432 | 0.015 |
| Glx-a (d1) | AKG       | 123xx                                                           | Not observed |       | 0.097 | 0.015 |
| Glx-a (d2) | AKG       | 123xx                                                           | Not observed |       | 0.374 | 0.015 |
| Glx-a (dd) | AKG       | 123xx                                                           | Not observed |       | 0.097 | 0.015 |
| Glx-b (s)  | AKG       | x234x                                                           | 0.094        | 0.010 | 0.027 | 0.013 |
| Glx-b (d)  | AKG       | x234x + x234x                                                   | 0.727        | 0.010 | 0.771 | 0.013 |
| Glx-b (t)  | AKG       | x234x                                                           | 0.179        | 0.010 | 0.202 | 0.013 |
| Glx-g (s)  | AKG       | xx345                                                           | 0.476        | 0.005 | 0.477 | 0.006 |
| Glx-g (d1) | AKG       | xx345                                                           | 0.059        | 0.005 | 0.065 | 0.006 |
| Glx-g (d2) | AKG       | xx345                                                           | 0.410        | 0.005 | 0.409 | 0.006 |
| Glx-g (dd) | AKG       | xx345                                                           | 0.054        | 0.005 | 0.049 | 0.006 |
| Gly-a (s)  | T3P       | 12x                                                             | 0.154        | 0.005 | 0.168 | 0.009 |
| Gly-a (d)  | T3P       | 12x                                                             | 0.846        | 0.005 | 0.832 | 0.009 |
| His-a (s)  | R5P       | xx345                                                           | Not observed |       | 0.098 | 0.019 |
| His-a (d1) | R5P       | xx345                                                           | Not observed |       | 0.078 | 0.019 |
| His-a (d2) | R5P       | xx345                                                           | Not observed |       | 0.000 | 0.019 |
| His-a (dd) | R5P       | xx345                                                           | Not observed |       | 0.824 | 0.019 |
| His-b (s)  | R5P       | x234x                                                           | 0.133        | 0.006 | 0.144 | 0.007 |
| His-b (d1) | R5P       | x234x                                                           | 0.681        | 0.006 | 0.663 | 0.007 |
| His-b (d2) | R5P       | x234x                                                           | 0.030        | 0.006 | 0.030 | 0.007 |
| His-b (dd) | R5P       | x234x                                                           | 0.156        | 0.006 | 0.163 | 0.007 |
| His-d2 (s) | R5P       | 12xxx                                                           | 0.666        | 0.015 | 0.666 | 0.016 |
| His-d2 (d) | R5P       | 12xxx                                                           | 0.334        | 0.015 | 0.334 | 0.016 |
| Ile-a (s)  | OAA       | 12xx.x2x                                                        | 0.174        | 0.024 | 0.199 | 0.026 |
| Ile-a (d1) | OAA       | 12xx.x2x                                                        | 0.672        | 0.024 | 0.715 | 0.026 |
| Ile-a (d2) | OAA       | 12xx.x2x                                                        | 0.061        | 0.024 | 0.000 | 0.026 |
| Ile-a (dd) | OAA       | 12xx.x2x                                                        | 0.093        | 0.024 | 0.086 | 0.026 |
| Ile-g1 (s) | OAA       | xx34.x2x                                                        | 0.736        | 0.021 | 0.678 | 0.019 |
| Ile-g1 (d) | OAA       | xx34.x2x + xx34.x2x                                             | 0.230        | 0.021 | 0.270 | 0.019 |
| Ile-g1 (t) | OAA       | xx34.x2x                                                        | 0.033        | 0.021 | 0.052 | 0.019 |
| Ile-d (s)  | OAA       | xx34                                                            | 0.833        | 0.032 | 0.833 | 0.021 |
| Ile-d (d)  | OAA       | xx34                                                            | 0.167        | 0.032 | 0.167 | 0.021 |
| Ile-g2 (s) | PYR       | x23                                                             | 0.537        | 0.032 | 0.535 | 0.021 |
| Ile-g2 (d) | PYR       | x23                                                             | 0.463        | 0.032 | 0.465 | 0.021 |
| Leu-a (s)  | ACCOA     | 12.x2x                                                          | 0.473        | 0.022 | 0.464 | 0.033 |
| Leu-a (d1) | ACCOA     | 12.x2x                                                          | 0.412        | 0.022 | 0.404 | 0.033 |
| Leu-a (d2) | ACCOA     | 12.x2x                                                          | 0.065        | 0.022 | 0.079 | 0.033 |
| Leu-a (dd) | ACCOA     | 12.x2x                                                          | 0.051        | 0.022 | 0.053 | 0.033 |
| Leu-b (s)  | PYR       | x2.x2x.x2x                                                      | 0.696        | 0.022 | 0.666 | 0.022 |
| Leu-b (d)  | PYR       | x2.x2x.x2x + x2.x2x.x2x                                         | 0.258        | 0.022 | 0.264 | 0.022 |
| Leu-b (t)  | PYR       | x2.x2x.x2x                                                      | 0.046        | 0.022 | 0.071 | 0.022 |
| Leu-d1 (s) | PYR       | x23                                                             | 0.646        | 0.027 | 0.647 | 0.019 |
| Leu-d1 (d) | PYR       | x23                                                             | 0.354        | 0.027 | 0.353 | 0.019 |
| Leu-d2 (s) | PYR       | xx3.x2x                                                         | 0.884        | 0.027 | 0.889 | 0.019 |
| Leu-d2 (d) | PYR       | xx3.x2x                                                         | 0.116        | 0.027 | 0.111 | 0.019 |
| Lys-b (s)  | PYR/OAA   | 0.5(x234 + x23.xxx4)                                            | 0.476        | 0.011 | 0.464 | 0.022 |
| Lys-b (d)  | PYR/OAA   | 0.5(x234 + x23.xxx4 + x234 + x23.xxx4)                          | 0.438        | 0.011 | 0.447 | 0.011 |
| Lys-b (t)  | PYR/OAA   | 0.5(x234 + x23.xxx4)                                            | 0.086        | 0.011 | 0.089 | 0.011 |
| Lys-g (s)  | OAA       | xx34.xx3                                                        | 0.527        | 0.016 | 0.546 | 0.016 |
| Lys-g (d)  | OAA       | xx34.xx3 + xx34.xx3                                             | 0.352        | 0.016 | 0.346 | 0.016 |
| Lys-g (t)  | OAA       | xx34.xx3                                                        | 0.121        | 0.016 | 0.109 | 0.016 |
| Lys-d (s)  | PYR/OAA   | 0.5(x234 + x23.xxx4)                                            | 0.429        | 0.011 | 0.422 | 0.012 |

|            |         |                                          |       |       |        |       |
|------------|---------|------------------------------------------|-------|-------|--------|-------|
| Lys-d (d)  | PYR/OAA | 0.5(x234 + x234 + x23·xxx4 + x23·xxx4)   | 0.457 | 0.011 | 0.459  | 0.012 |
| Lys-d (t)  | PYR/OAA | 0.5(x234 + x23·xxx4)                     | 0.115 | 0.011 | 0.119  | 0.012 |
| Lys-e (s)  | PYR/OAA | 0.5(x23+x23x)                            | 0.110 | 0.008 | 0.111  | 0.011 |
| Lys-e (d)  | PYR/OAA | 0.5(x23+x23x)                            | 0.890 | 0.008 | 0.889  | 0.011 |
| Met-a (s)  | OAA     | 123x                                     | 0.105 | 0.022 | 0.113  | 0.022 |
| Met-a (d1) | OAA     | 123x                                     | 0.036 | 0.022 | 0.034  | 0.022 |
| Met-a (d2) | OAA     | 123x                                     | 0.088 | 0.022 | 0.105  | 0.022 |
| Met-a (dd) | OAA     | 123x                                     | 0.771 | 0.022 | 0.748  | 0.022 |
| Met-b (s)  | OAA     | x234                                     | 0.485 | 0.024 | 0.445  | 0.024 |
| Met-b (d)  | OAA     | x234 + x234                              | 0.415 | 0.024 | 0.423  | 0.024 |
| Met-b (t)  | OAA     | x234                                     | 0.100 | 0.024 | 0.132  | 0.024 |
| Met-g (s)  | OAA     | xx34                                     | 0.888 | 0.023 | 0.891  | 0.023 |
| Met-g (d)  | OAA     | xx34                                     | 0.112 | 0.023 | 0.109  | 0.023 |
| Phe-a (s)  | PEP     | 123                                      | 0.060 | 0.017 | 0.102  | 0.017 |
| Phe-a (d1) | PEP     | 123                                      | 0.000 | 0.017 | 0.001  | 0.017 |
| Phe-a (d2) | PEP     | 123                                      | 0.064 | 0.017 | 0.002  | 0.017 |
| Phe-a (dd) | PEP     | 123                                      | 0.876 | 0.017 | 0.895  | 0.017 |
| Phe-b (s)  | PEP     | x23·x2x                                  | 0.515 | 0.022 | 0.507  | 0.022 |
| Phe-b (d1) | PEP     | x23·x2x                                  | 0.378 | 0.022 | 0.376  | 0.022 |
| Phe-b (d2) | PEP     | x23·x2x                                  | 0.054 | 0.022 | 0.058  | 0.022 |
| Phe-b (dd) | PEP     | x23·x2x                                  | 0.052 | 0.022 | 0.059  | 0.022 |
| Phe-d (s)  | PEP/E4P | 0.5(x23·1xxx+x2x·xx34)                   | 0.641 | 0.026 | 0.641  | 0.029 |
| Phe-d (d)  | PEP/E4P | 0.5(x23·1xxx+x2x·xx34+x23·1xxx+x2x·xx34) | 0.331 | 0.026 | 0.331  | 0.029 |
| Phe-d (t)  | PEP/E4P | 0.5(x23·1xxx+x2x·xx34)                   | 0.028 | 0.026 | 0.028  | 0.029 |
| Pro-a (s)  | AKG     | 123xx                                    | 0.432 | 0.005 | 0.432  | 0.008 |
| Pro-a (d1) | AKG     | 123xx                                    | 0.088 | 0.005 | 0.087  | 0.008 |
| Pro-a (d2) | AKG     | 123xx                                    | 0.390 | 0.005 | 0.388  | 0.008 |
| Pro-a (dd) | AKG     | 123xx                                    | 0.089 | 0.005 | 0.092  | 0.008 |
| Pro-b (s)  | AKG     | x234x                                    | 0.046 | 0.010 | -0.004 | 0.031 |
| Pro-b (d)  | AKG     | x234x + x234x                            | 0.737 | 0.010 | 0.709  | 0.031 |
| Pro-b (t)  | AKG     | x234x                                    | 0.209 | 0.010 | 0.295  | 0.031 |
| Pro-g (s)  | AKG     | xx345                                    | 0.418 | 0.011 | 0.426  | 0.015 |
| Pro-g (d)  | AKG     | xx345 + xx345                            | 0.465 | 0.011 | 0.468  | 0.015 |
| Pro-g (t)  | AKG     | xx345                                    | 0.117 | 0.011 | 0.107  | 0.015 |
| Pro-d (s)  | AKG     | xxx45                                    | 0.099 | 0.008 | 0.093  | 0.008 |
| Pro-d (d)  | AKG     | xxx45                                    | 0.901 | 0.008 | 0.907  | 0.008 |
| Ser-a (s)  | 3PDGL   | 123                                      | 0.069 | 0.011 | 0.094  | 0.011 |
| Ser-a (d1) | 3PDGL   | 123                                      | 0.053 | 0.011 | 0.226  | 0.011 |
| Ser-a (d2) | 3PDGL   | 123                                      | 0.000 | 0.011 | 0.059  | 0.011 |
| Ser-a (dd) | 3PDGL   | 123                                      | 0.879 | 0.011 | 0.621  | 0.011 |
| Ser-b (s)  | 3PDGL   | x23                                      | 0.733 | 0.017 | 0.726  | 0.017 |
| Ser-b (d)  | 3PDGL   | x23                                      | 0.267 | 0.017 | 0.274  | 0.017 |
| Thr-a (s)  | OAA     | 123x                                     | 0.120 | 0.009 | 0.123  | 0.009 |
| Thr-a (d1) | OAA     | 123x                                     | 0.022 | 0.009 | 0.023  | 0.009 |
| Thr-a (d2) | OAA     | 123x                                     | 0.103 | 0.009 | 0.101  | 0.009 |
| Thr-a (dd) | OAA     | 123x                                     | 0.754 | 0.009 | 0.752  | 0.009 |
| Thr-b (s)  | OAA     | x234                                     | 0.498 | 0.010 | 0.488  | 0.014 |
| Thr-b (d)  | OAA     | x234 + x234                              | 0.417 | 0.010 | 0.424  | 0.014 |
| Thr-b (t)  | OAA     | x234                                     | 0.085 | 0.010 | 0.088  | 0.014 |
| Thr-g (s)  | OAA     | xx34                                     | 0.811 | 0.015 | 0.810  | 0.021 |
| Thr-g (d)  | OAA     | xx34                                     | 0.188 | 0.015 | 0.190  | 0.021 |
| Tyr-a (s)  | PEP     | 123                                      | 0.112 | 0.013 | 0.134  | 0.013 |
| Tyr-a (d1) | PEP     | 123                                      | 0.005 | 0.013 | 0.002  | 0.013 |
| Tyr-a (d2) | PEP     | 123                                      | 0.010 | 0.013 | 0.003  | 0.013 |
| Tyr-a (dd) | PEP     | 123                                      | 0.873 | 0.013 | 0.862  | 0.013 |
| Tyr-b (s)  | PEP     | x23·x2x                                  | 0.516 | 0.011 | 0.495  | 0.011 |
| Tyr-b (d)  | PEP     | x23·x2x + x23·x2x                        | 0.414 | 0.011 | 0.413  | 0.011 |
| Tyr-b (t)  | PEP     | x23·x2x                                  | 0.075 | 0.011 | 0.093  | 0.011 |
| Tyr-d (s)  | PEP/E4P | 0.5(x23·1xxx+x2x·xx34)                   | 0.520 | 0.012 | 0.520  | 0.012 |
| Tyr-d (d)  | PEP/E4P | 0.5(x23·1xxx+x2x·xx34+x23·1xxx+x2x·xx34) | 0.435 | 0.012 | 0.435  | 0.012 |
| Tyr-d (t)  | PEP/E4P | 0.5(x23·1xxx+x2x·xx34)                   | 0.044 | 0.012 | 0.044  | 0.012 |
| Tyr-e (s)  | E4P     | 0.5(12xx·xx3 + x234)                     | 0.391 | 0.009 | 0.391  | 0.009 |
| Tyr-e (d)  | E4P     | 0.5(12xx·xx3 + x234 + x234 + 12xx·xx3)   | 0.175 | 0.009 | 0.175  | 0.009 |
| Tyr-e (t)  | E4P     | 0.5(12xx·xx3 + x234)                     | 0.434 | 0.009 | 0.434  | 0.009 |
| Val-a (s)  | PYR     | 12x·x2x                                  | 0.361 | 0.022 | 0.389  | 0.024 |
| Val-a (d1) | PYR     | 12x·x2x                                  | 0.525 | 0.022 | 0.469  | 0.024 |
| Val-a (d2) | PYR     | 12x·x2x                                  | 0.049 | 0.022 | 0.072  | 0.024 |
| Val-a (dd) | PYR     | 12x·x2x                                  | 0.065 | 0.022 | 0.070  | 0.024 |
| Val-g1 (s) | PYR     | x23                                      | 0.545 | 0.028 | 0.549  | 0.015 |
| Val-g1 (d) | PYR     | x23                                      | 0.455 | 0.028 | 0.451  | 0.015 |
| Val-g2 (s) | PYR     | xx3·x2x                                  | 0.883 | 0.028 | 0.884  | 0.015 |
| Val-g2 (d) | PYR     | xx3·x2x                                  | 0.117 | 0.028 | 0.116  | 0.015 |

\*Isotopomer abundances were measured from multiplets of cross-peaks of proteinogenic amino acids on  $[^{13}\text{C}, ^1\text{H}]$  HSQC spectra and are reported as fractions of the total signal of the corresponding cross-peak. Standard deviations were derived from measured signal:noise ratios of the NMR spectra. Isotopomers are grouped and color-coded by the metabolic precursors from which they originate. Multiplets abbreviations are as described in the manuscript.



**Supplementary Table 3.** Probabilistic expressions developed to calculate the relative intensities of  $^{13}\text{C}$  multiplet components in biosynthetically directed  $^{13}\text{C}$ -labeled amino acids.

| <b>K</b>            | <b>Expression for different carbon atoms</b>                                     |                                                                               |
|---------------------|----------------------------------------------------------------------------------|-------------------------------------------------------------------------------|
|                     | <b>Terminal carbon atom</b>                                                      |                                                                               |
| $\mathbf{K}^{(1)}$  | $K_S^{(1)} = [(1-x)(1-P_n)]$                                                     | $K_d^{(1)} = [x + (1-x)P_n]$                                                  |
| $\mathbf{K}^{(2)}$  | $K_S^{(2)} = \left[ \frac{y(1-P_n) + (1-x-y)P_n(1-P_n)}{x+y+(1-x-y)P_n} \right]$ | $K_d^{(2)} = \left[ \frac{x+yP_n + (1-x-y)P_n^2}{x+y+(1-x-y)P_n} \right]$     |
|                     | <b>Central carbon atoms</b>                                                      |                                                                               |
| $\mathbf{K}^{(1)}$  | $K_S^{(1)} = \left[ \frac{D\{(1-x-y)(1-P_n)\}(1-D)}{D} \right]$                  | $K_{da}^{(1)} = \left[ \frac{D\{x+y+(1-x-y)P_n\}(1-D)}{D} \right]$            |
|                     | $K_{db}^{(1)} = \left[ \frac{D^2\{(1-x-y)(1-P_n)\}}{D} \right]$                  | $K_{dd}^{(1)} = \left[ \frac{D^2\{x+y+(1-x-y)P_n\}}{D} \right]$               |
|                     | $K_S^{(2a)} = \left[ \frac{(1-x-y)(1-P_n)P_n(1-D)}{D} \right]$                   | $K_{da}^{(2a)} = \left[ \frac{\{x+yP_n + (1-x-y)P_n^2\}(1-D)}{D} \right]$     |
| $\mathbf{K}^{(2a)}$ | $K_{db}^{(2a)} = \left[ \frac{(1-x-y)(1-P_n)P_nD}{D} \right]$                    | $K_{dd}^{(2a)} = \left[ \frac{\{x+yP_n + (1-x-y)P_n^2\}D}{D} \right]$         |
|                     | $K_S^{(2b)} = \left[ \frac{(1-x-y)(1-P_n)P_n(1-D)}{D} \right]$                   | $K_{da}^{(2b)} = \left[ \frac{\{x+y+(1-x-y)P_n\}(1-D)P_n}{D} \right]$         |
| $\mathbf{K}^{(2b)}$ | $K_{db}^{(2b)} = \left[ \frac{\{x+(1-x)P_n^2\}(1-x-y)(1-P_n)}{D} \right]$        | $K_{dd}^{(2b)} = \left[ \frac{\{x+(1-x)P_n^2\}\{x+y+(1-x-y)P_n\}}{D} \right]$ |
|                     | $K_3^{(3)} = \left[ \frac{(1-x-y)P_n(1-P_n)^2}{D} \right]$                       | $K_{da}^{(3)} = \left[ \frac{P_n(1-P_n)\{y+(1-x-y)P_n\}}{D} \right]$          |
| $\mathbf{K}^{(3)}$  | $K_{db}^{(3)} = \left[ \frac{(1-x-y)P_n^2(1-P_n)}{D} \right]$                    | $K_{dd}^{(3)} = \left[ \frac{x+yP_n^2 + (1-x-y)P_n^3}{D} \right]$             |
|                     | with $D = x + (1-x)P_n$                                                          |                                                                               |

The fractions of glucose isotopomers are represented as  $x$  (fraction of  $\text{U-}^{13}\text{C}$  labeled glucose),  $y$  (fraction of  $1\text{-}^{13}\text{C}$  labeled glucose), and  $1-x-y$  (fraction of unlabeled glucose). The unlabeled carbon atoms exhibit natural  $^{13}\text{C}$  labeling with a probability  $P_n$  (Szyprski, 1995). A central carbon atom (*cent*) can exhibit nine peaks corresponding to four relative isotopomer intensities  $I_s$ ,  $I_{da}$ ,  $I_{db}$  and  $I_{dd}$  (Szyprski, 1995). These arise from a singlet (*s*), a doublet split by a small coupling constant (*da*), a doublet split by a larger coupling constant (*db*), and a doublet of doublets (*dd*). A terminal carbon atom (*term*) can exhibit two relative intensities,  $I_s$  and  $I_d$ . A vector  $\mathbf{I}$  can be defined such that  $\mathbf{I}_{\text{term}} = (I_s, I_d)$  and  $\mathbf{I}_{\text{cent}} = (I_s, I_{da}, I_{db}, I_{dd})$ . The vector  $\mathbf{K}^i$ , on the other hand, denotes the relative intensities of multiplet components (with  $i$  denoting the number of intensities).  $\mathbf{K}^i$  is defined as  $\mathbf{K}^i = (K_s^i, K_d^i) \langle i = 1, 2 \rangle$  for a terminal carbon and  $\mathbf{K}^i = (K_s^i, K_{da}^i, K_{db}^i, K_{dd}^i) \langle i = 1, 2a, 2b, 3 \rangle$  for a central carbon (Szyprski, 1995).

- **Szyprski, T.** 1995. Biosynthetically directed fractional  $^{13}\text{C}$  labeling of proteinogenic amino acids. Eur. J. Biochem. 232:433-448.

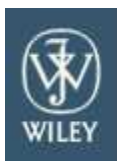

**Design of <sup>13</sup>C Labeling Experiments to Estimate Metabolic Fluxes in Escherichia coli During the Anaerobic Fermentation of Glucose**

|                               |                                                                                                                                                                                                                                                                                                                              |
|-------------------------------|------------------------------------------------------------------------------------------------------------------------------------------------------------------------------------------------------------------------------------------------------------------------------------------------------------------------------|
| Journal:                      | <i>Biotechnology Progress</i>                                                                                                                                                                                                                                                                                                |
| Manuscript ID:                | BTPR-10-0131                                                                                                                                                                                                                                                                                                                 |
| Wiley - Manuscript type:      | Research Article                                                                                                                                                                                                                                                                                                             |
| Date Submitted by the Author: | 04-Apr-2010                                                                                                                                                                                                                                                                                                                  |
| Complete List of Authors:     | Choudhary, Madhuresh; Iowa State University, Chemical and Biological Engineering<br>Yoon, Jong Moon; Iowa State University, Chemical and Biological Engineering<br>Gonzalez, Ramon; Rice University, Chemical and Biomolecular Engineering<br>Shanks, Jacqueline; Iowa State University, Chemical and Biological Engineering |
| Keywords:                     | Escherichia coli, metabolic flux analysis, anaerobic, identifiability                                                                                                                                                                                                                                                        |
|                               |                                                                                                                                                                                                                                                                                                                              |

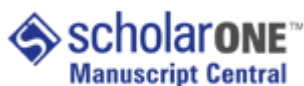

1  
2  
3 **Design of  $^{13}\text{C}$  Labeling Experiments to Estimate Metabolic Fluxes in**  
4 ***Escherichia coli* During the Anaerobic Fermentation of Glucose**  
5  
6  
7

8  
9 Madhuresh K. Choudhary and Jong Moon Yoon

10 Dept. Chemical and Biological Engineering, Iowa State University, Ames, IA 50011  
11  
12

13  
14 Ramon Gonzalez

15  
16 Dept. of Chemical and Biomolecular Engineering, Rice University, Houston, TX 77251

17  
18 Dept. of Bioengineering, Rice University, Houston, TX 77251  
19  
20

21  
22 Jacqueline V. Shanks

23  
24 Dept. Chemical and Biological Engineering, Iowa State University, Ames, IA 50011  
25  
26  
27  
28  
29  
30  
31  
32  
33  
34  
35  
36  
37  
38  
39  
40  
41  
42  
43  
44  
45  
46  
47  
48  
49

50 Corresponding author: Jacqueline V. Shanks

51 3031 Sweeney Hall, Iowa State University, Ames, Iowa 50011

52  
53 E-mail: [jshanks@iastate.edu](mailto:jshanks@iastate.edu)  
54  
55  
56  
57  
58  
59  
60

## 1 Abstract

2 Metabolic fluxes are an important physiological characteristic, providing a global  
3 perspective of the integrated functioning between levels of transcripts, proteins, and metabolites  
4 to cellular phenotype. Comprehensive metabolic flux maps for *Escherichia coli* under anaerobic  
5 conditions were determined by using a mixture of differently labeled glucose and compared to  
6 conventional flux maps and comprehensive metabolic flux maps obtained with using only U-<sup>13</sup>C  
7 glucose as the substrate. As expected, conventional flux analysis performs poorly in comparison  
8 to <sup>13</sup>C-MFA, especially in the elucidation of carbon partitioning between the Embden-Meyerhof-  
9 Parnas (EMP) and pentose phosphate (PP) pathways. An identifiability analysis indicated that a  
10 mixture of 10% U-<sup>13</sup>C glucose, 25 % 1-<sup>13</sup>C glucose, and 65% naturally labeled glucose would  
11 significantly improve the statistical quality of calculated fluxes over other labeling schemes.  
12 Indeed, experimentally the statistical quality of all fluxes in the PP pathway, the EMP pathway,  
13 the anaplerotic reactions, and the tricarboxylic acid cycle were improved. The effect of network  
14 topology was studied by investigating the distribution of metabolic fluxes in the presence and  
15 absence of the Entner-Doudoroff pathway, the malic enzyme, and the glyoxylate shunt. These  
16 changes did not affect the value or quality of estimated fluxes in a significant way. Another  
17 aspect investigated was the possibility of estimating intracellular fluxes from labeling data alone.  
18 While the combined acetate-ethanol flux can be estimated from the labeling information, the  
19 fluxes around the formate node cannot be estimated in the absence of a formate measurement.

20  
21 **Keywords:** *Escherichia coli*, identifiability, anaerobic, metabolic flux analysis,

## 1 Introduction

2  
3  
4  
5  
6  
7  
8  
9  
10  
11  
12  
13  
14  
15  
16  
17  
18  
19  
20  
21  
22  
23  
24  
25  
26  
27  
28  
29  
30  
31  
32  
33  
34  
35  
36  
37  
38  
39  
40  
41  
42  
43  
44  
45  
46  
47  
48  
49  
50  
51  
52  
53  
54  
55  
56  
57  
58  
59  
60

Metabolic flux analysis (MFA) has become an important tool in cellular physiology and metabolic engineering as it allows the quantification of steady state intracellular fluxes in a metabolic network.<sup>1-3</sup> Flux measurements and changes in the distribution of metabolic fluxes in response to genetic and environmental perturbations contribute to elucidating the contribution of various pathways in cellular metabolism and can support the design of metabolic engineering strategies.<sup>4</sup>

The classical approach of analyzing intracellular carbon fluxes is metabolite balancing<sup>5</sup> and we refer to it here as conventional metabolic flux analysis (c-MFA). c-MFA is based on mass balances around intracellular metabolites (which are considered in pseudo steady state) with the measurements of extracellular fluxes acting as constraints for flux calculation. Frequently, the lack of enough measurements requires assumptions about redox (NADH/NADPH) or energy (ATP) balances. However, incomplete knowledge about pathways involving NADH/NADPH or ATP (which is very common as these cofactors are involved in a very large number of reactions) can lead to incorrect flux estimation. Moreover, c-MFA cannot account for parallel metabolic pathways, metabolic cycles, and reversible or bidirectional reactions.<sup>6</sup>

The use of <sup>13</sup>C-labeled substrates provides additional constraints to the stoichiometric equations used in c-MFA, avoiding assumptions about redox and energy balances and potentially accounting for parallel pathways, cycles, and reversibility.<sup>5</sup> In this approach, a mixture of a specifically <sup>13</sup>C-labeled substrate and a naturally abundant version of the same substrate are fed to the organism of interest and the <sup>13</sup>C enrichments or isotopomer distributions in the carbon

1 atoms of different metabolites are measured. The most common metabolites used for this  
2 purpose are proteinogenic amino acids because they are abundant, stable, and their labeling  
3 pattern reflects that of precursors metabolites generated in central metabolism. In one approach  
4 introduced by Szyperski,<sup>7</sup> the biosynthetically directed fractional <sup>13</sup>C labeling of proteinogenic  
5 amino acids is measured through 2-D [<sup>13</sup>C, <sup>1</sup>H] HSQC (Heteronuclear Single-Quantum  
6 Coherence) or COSY (Correlation Spectroscopy) NMR experiments. Probabilistic equations are  
7 then used to relate the observed multiplet intensities of the <sup>13</sup>C fine structures to the relative  
8 abundance of the intact carbon fragments and are very useful in the quantitative study of  
9 intermediary metabolism.<sup>7,8</sup> An extended version of this approach, called metabolic flux ratio  
10 (MetaFoR) analysis, was later introduced by Szyperski and co-workers.<sup>9</sup> MetaFoR aims at  
11 obtaining relative local fluxes around a node from the abundances of intact carbon fragments in  
12 metabolites (calculated from the aforementioned 2-D [<sup>13</sup>C, <sup>1</sup>H] NMR data).<sup>10,11</sup> Comprehensive  
13 <sup>13</sup>C-based metabolic flux analysis (<sup>13</sup>C-MFA), which cannot be performed with MetaFoR, is  
14 achieved through a modeling approach that requires information on the metabolic network,  
15 labeling patterns of amino acids, and extracellular fluxes. This information is combined in an  
16 error function that accounts for the average difference between measured and simulated labeling  
17 patterns. An iterative, optimization procedure is followed to solve for intracellular fluxes that  
18 minimize this error function.<sup>5,12</sup>

19 While <sup>13</sup>C-MFA has been extensively used to study the metabolism of wild-type and  
20 recombinant *E. coli* growing under aerobic conditions,<sup>13-22</sup> only a handful of studies has  
21 examined fermentative metabolism.<sup>7,17,23</sup> Among the latter, Szyperski<sup>7</sup> used biosynthetically  
22 directed fractional <sup>13</sup>C labeling of proteinogenic amino acids to analyze important metabolic  
23 branch points under anaerobic conditions. The NMR data were used to calculate the bond

1 integrity of precursor molecules that were in turn used to estimate flux ratios. Using the same  
2 NMR data, Schmidt *et al.*<sup>23</sup> carried out the first comprehensive <sup>13</sup>C-MFA where isotopomer  
3 balances were used in conjunction with constrains from extracellular fluxes. However, the  
4 extracellular measurements used in the flux estimation criterion were obtained from a different  
5 study conducted with unlabeled glucose.<sup>24</sup> Using the MetaFoR approach described above, Sauer  
6 *et al.*<sup>17</sup> reported the analysis of flux ratios at a few nodes under anaerobic conditions.

7 None of the aforementioned studies examined the appropriate labeling required to  
8 identify metabolic fluxes during the anaerobic fermentation of glucose in *E. coli*. In this work,  
9 we report the design of <sup>13</sup>C labeling experiments, including identifiability analysis, to estimate  
10 metabolic fluxes in *E. coli* during the fermentative metabolism of glucose. We found that the use  
11 of 1-<sup>13</sup>C- and U-<sup>13</sup>C-labeled glucose in combination with extracellular measurements yielded the  
12 most reliable estimate of intracellular fluxes.

## 13 **Materials and Methods**

### 14 ***Strain, medium and culture conditions***

15 *Escherichia coli* K12 strain W3110 (ATCC 27325) was used throughout the study. The  
16 minimal media<sup>25</sup> with 1% glucose was used. Ten-time-concentrated media solution was prepared  
17 and stored at -20 °C after filter sterilization. Chemicals were obtained from Fisher Scientific  
18 (Pittsburgh, PA) and Sigma-Aldrich Co. (St Louis, MO), except <sup>13</sup>C-labeled glucose, which was  
19 obtained from Cambridge Isotope Ltd (Andover, MA).

20 Fermentations were conducted in a 1L bioreactor (Bioflow 110, New Brunswick  
21 Scientific, Edison, NJ) with a working volume of 0.9 L and independent control of temperature

1 (37 °C), pH (6.8), and stirrer speed (200 r.p.m.). The system is fully equipped and computer  
2 controlled using manufacturer BioCommand software. A condenser was installed and operated at  
3 4 °C to minimize evaporation out of the bioreactor vessel. The pH was controlled by adding 4M  
4 KOH and anaerobic conditions were maintained by flushing the headspace with high purity  
5 nitrogen (Airgas North Central, Des Moines, IA).

6 Pre-cultures used to inoculate the above fermenters were prepared as follows. A single  
7 colony was used to inoculate two 50 mL conical tubes (BD Biosciences, San Jose, CA)  
8 completely filled with minimal medium supplemented with 10 g/L of glucose. The tubes were  
9 placed in a rotator and kept at 37 °C until a cell density of 0.6 OD<sub>550</sub> (Genesys 20, Thermo  
10 Scientific, MA, USA) was reached. This actively growing pre-culture was centrifuged at 5000g  
11 for 15 min at 4 °C and the pellet resuspended in minimal medium to inoculate the fermenter with  
12 a target starting OD<sub>550</sub> of 0.05.

#### 14 *Analytical methods*

15 Optical density was measured at 550 nm in a Genesys 20 spectrophotometer (Thermo  
16 Scientific, MA, USA) and used as an estimate of cell mass (1 O.D.<sub>550</sub> = 0.36 g dry weight/L).  
17 After centrifugation, the supernatants were stored at -20 °C for HPLC (High Performance Liquid  
18 Chromatography) analysis (glucose and fermentation products) using a Waters HPLC system  
19 (Milford, MA) with a 410 refractive index (RI) detector. The Aminex column (HPX-87H, Bio-  
20 Rad, Hercules, CA, USA) was maintained at 42 °C and 5 mM H<sub>2</sub>SO<sub>4</sub> was used as the mobile  
21 phase at a flow rate of 0.3 mL/min.

#### 23 *Sample preparation for NMR experiments*



1 Experiments with  $^{13}\text{C}$ -labeled glucose were conducted to assess the incorporation of this  
2 carbon source into proteinogenic biomass, information that was then used to calculate  
3 isotopomer abundance and estimate intracellular fluxes (see next sections). Two experiments  
4 were carried out, one with 10%  $\text{U-}^{13}\text{C}$  glucose and 90% naturally labeled glucose and another  
5 one with 10%  $\text{U-}^{13}\text{C}$  glucose, 25%  $1\text{-}^{13}\text{C}$  glucose and 65% naturally labeled glucose. Cultures  
6 grown as described in the previous section were harvested when the  $\text{OD}_{550}$  was 0.6 (mid  
7 exponential phase) and kept in an ice-water bath. The cells were centrifuged at 5000g for 15 min  
8 at  $4^\circ\text{C}$  and the pellets washed with 0.9% saline water. An appropriate amount of the pellet was  
9 transferred to hydrolysis tubes (Pierce Endogen, Rockford, IL), to which 6 N hydrochloric acid  
10 was added (1 mL of HCl per 4 mg of biomass). The hydrolysis was performed at  $110^\circ\text{C}$  for 12  
11 hours after flushing the tubes with nitrogen. The acid in the protein hydrolysates was evaporated  
12 in a Rapidvap evaporator (Labconco, Kansas City, MO). The residue was reconstituted in 2 mL  
13 of deionized water, lyophilized for 72 h, and dissolved in 500  $\mu\text{L}$   $\text{D}_2\text{O}$  in an NMR tube. The pH  
14 of the NMR sample was adjusted to 1 using DCl.

#### 16 *NMR experiments and calculation of isotopomer fractions*

17 Samples prepared as described above were analyzed via NMR spectroscopy to determine  
18 the labeling pattern of proteinogenic amino acids. Two-dimensional Heteronuclear Single-  
19 Quantum Coherence [ $^{13}\text{C}, ^1\text{H}$ ]-correlation (2D  $^1\text{H-}^{13}\text{C}$  HSQC) NMR spectra<sup>9,26,30</sup> were acquired  
20 on a Bruker Avance DRX 500 MHz spectrometer (Bruker Instruments, Billerica, MA) at 298 K.  
21 The reference to 0 ppm was set using the methyl signal of dimethylsilapentane sulfonate (Sigma,  
22 St. Louis) as an internal standard. The resonance frequency of  $^{13}\text{C}$  and  $^1\text{H}$  were 125.7 MHz and  
23 499.9 MHz, respectively. The spectral width was 5,482.26 Hz along the  $^1\text{H}$  (F2) dimension and

1 5,028.05 Hz along the  $^{13}\text{C}$  (F1) dimension. Peak aliasing was used in order to minimize the  
2 sweep width along the F1 dimension. The number of complex data points was 1,024 ( $^1\text{H}$ )  $\times$  900  
3 ( $^{13}\text{C}$ ). A modification of the INEPT (insensitive nuclei enhanced by polarization transfer) pulse  
4 sequence was used for acquiring HSQC spectra. The number of scans was generally set to 16.

5 The software Xwinnmr (Bruker Instruments, Billerica, MA) was used to acquire all  
6 spectra, and the software NMRView<sup>27</sup> was used to quantify nonoverlapping multiplets on the  
7 HSQC spectrum. Overlapping multiplets ( $\alpha$ -amino acids), which could not be processed with  
8 NMRView, were quantified by a previously developed peak deconvolution software<sup>28</sup> that is  
9 based on the spectral processing algorithm proposed by Van Winden *et al.*<sup>29</sup> The standard  
10 deviations associated with the NMR intensity measurements were estimated from the noise to  
11 peak intensity ratio with minimum set to 1%. The resulting intensities were used to calculate the  
12 isotopomer fractions shown in Supplementary Table 4. Isotopomer fractions, in turn, represent  
13 the key input used in the calculation of metabolic fluxes as described in the next section.

### 14 15 ***Metabolic flux analysis (MFA)***

16 The metabolic network used in the Metabolic Flux Analysis (MFA) is shown in Figure 1  
17 and Supplementary Table 1. MFA was conducted using two different approaches. First,  
18 intracellular fluxes were estimated based on network stoichiometry and extracellular  
19 measurements using the technique of metabolite balancing,<sup>1</sup> which we refer to here as  
20 “conventional” MFA (c-MFA). The metabolic network consists of reactions involved in the  
21 transport and phosphorylation of glucose via the (PEP)-dependent phosphotransferase system  
22 (PTS), the Embden-Meyerhof-Parnas (EMP) and Pentose Phosphate (PP) pathways, anaplerotic

1  
2  
3 1 reactions, reductive and oxidative branches of the tricarboxylic acid (TCA) cycle, along with  
4  
5  
6 2 fermentative and biosynthetic reactions (Figure 1) (see also Supplementary Table 1). The  
7  
8 3 stoichiometric model used for c-MFA consisted of 37 reactions (fluxes) and 20 balanceable  
9  
10 4 metabolites (rows in Supplementary Table 2), thus resulting in a system with 17 degrees of  
11  
12  
13 5 freedom. The fermentation data was used to calculate 17 extracellular fluxes (i.e. specific rates)  
14  
15 6 associated with biomass synthesis, consumption of glucose, and synthesis of fermentation  
16  
17 7 products (columns in blue color in Supplementary Table 2). The availability of these 17  
18  
19  
20 8 extracellular fluxes made the system determined and allowed the calculation of intracellular  
21  
22 9 fluxes without the use of an optimization routine. Three independent pairs of measurements were  
23  
24  
25 10 used in the calculations, thus allowing the estimation of standard deviations.

26  
27 11 A second MFA technique, based on the use  $^{13}\text{C}$  labeled substrate(s), NMR analysis and  
28  
29 12 isotopomer balancing, was also employed to estimate intracellular fluxes (referred to here as  $^{13}\text{C}$ -  
30  
31 13 based MFA or  $^{13}\text{C}$ -MFA). The metabolic network was similar to that described above for c-MFA  
32  
33  
34 14 but now accounted for reversibility of reactions, cyclic nature of the TCA cycle, and included the  
35  
36 15 glyoxylate shunt and other reactions as described below (see Supplementary Table 3 and Figure  
37  
38  
39 16 1). The carbon fate of precursors leading to proteinogenic amino acids was established based on  
40  
41 17 the work of Szyperski.<sup>7</sup> The synthesis of serine from 3-phospho-glycerate and the one carbon  
42  
43  
44 18 metabolism of serine to glycine were also included in the model. Fermentation reactions leading  
45  
46 19 to acetate and ethanol from acetyl-CoA (Figure 1) were combined as they lead to similar carbon  
47  
48 20 rearrangement. Triose phosphates were considered as a single metabolite pool (G3P). Since a  
49  
50 21 high exchange between ribose-5-phosphate and xylose-5-phosphate was observed, a single  
51  
52  
53 22 pentose phosphate pool (R5P) was assumed. The reactions leading to the oxidative pentose  
54  
55 23 pathway (ox-PPP, glucose-6-phosphate dehydrogenase) and the TCA cycle (citrate synthase)

1 were considered irreversible with no negative flux allowed through them. The reactions through  
2 phosphoglucose isomerase and enolase in the EMP pathway and transketolases and  
3 transaldolases in the PPP (Figure 1) were considered reversible. The flux through pyruvate  
4 formate lyase was also assumed to be reversible. Since succinate is a symmetric molecule, the  
5 scrambling reaction was also included in the model. The forward ( $V_1$ ) and backward ( $V_{-1}$ ) fluxes  
6 associated with each reversible reaction step were transformed into a net flux ( $V_{net}$ ) and extent of  
7 reversibility ( $r$ )

$$V_{net} = V_1 - V_{-1} \quad r = \frac{\min(V_1, V_{-1})}{\max(V_1, V_{-1})} \quad (1)$$

9 In order to avoid numerical problems, the extents of reversibility were constrained  
10 between 0 and 0.99.

11 The flux of precursor metabolites toward biomass was estimated based on measurements  
12 of biomass yield and literature data on biomass composition (Table 1). The following were  
13 chosen as free fluxes: glucose uptake, production of lactate and succinate, oxidative pentose  
14 pathway (ox-PPP), glyoxylate shunt pathway, and biomass synthesis. The extents of reversibility  
15 were also considered as free parameters. The pools of intracellular metabolites were assumed to  
16 be in isotopic steady state and the dilution effect in HSQC labeling measurement due to initial  
17 unlabeled biomass was considered negligible.

18 Estimation of intracellular fluxes via  $^{13}\text{C}$ -MFA required modifying the computer program  
19 NMR2Flux (originally developed to estimate metabolic fluxes in plants<sup>28,30</sup>) to a generic form  
20 that uses as input metabolic network information from any system (i.e. reaction stoichiometries  
21 and carbon skeleton rearrangements). The other input to the software are isotopomer abundances  
22 and extracellular flux and biomass composition data, which were obtained as described in

1 previous sections. NMR2Flux estimates fluxes by minimizing the difference between simulated  
 2 and experiment NMR intensities. Free fluxes are first guessed and used to calculate all  
 3 intracellular fluxes using stoichiometric balances. The calculated set of fluxes allows estimating  
 4 labeling patterns for proteinogenic amino acids (i.e. simulated intensities,  $I_{sim}$ ). A chi-square ( $\chi^2$ )  
 5 is then calculated for the difference between simulated and experimental intensities ( $I_{sim}$  and  $I_{exp}$ ,  
 6 respectively). The extracellular flux measurements ( $F_{mes}$ ) of acetate-ethanol and formate were  
 7 also included in the  $\chi^2$ .

$$\chi^2 = \frac{(I_{sim} - I_{exp})^2}{N_{exp}^2} + \frac{(F_{mes} - F_{sim})^2}{N^2} \quad (2)$$

9 The set of fluxes that gives minimum  $\chi^2$  is taken as the best estimate of the metabolic  
 10 fluxes. To verify the global error minimum, multiple simulations were carried out from different  
 11 starting points. A statistical error analysis was performed by using a Monte Carlo simulations  
 12 approach<sup>31</sup> in which synthetic NMR intensities were used as surrogate for experimental data.  
 13 Finally, the set of 100 flux distributions obtained by Monte Carlo simulation were used to  
 14 calculate standard deviations for the fluxes.

### 16 **Identifiability analysis**

17 An identifiability analysis was conducted to determine the effect of substrate labeling on  
 18 the statistical identifiability of the fluxes<sup>32,33</sup>. This analysis used the information content ( $IC$ ) as  
 19 the objective criterion for identifiability.  $IC$  is defined as the reciprocal of the geometric mean of  
 20 the standard deviation ( $SD$ ) of the fluxes. The geometric mean of the  $SD$  is the  $n^{\text{th}}$  root of  $D$   
 21 ( $\sqrt[n]{D}$ ), where  $n$  is number of flux parameters and  $D$  is the D-criterion that measures the volume  
 22 of the confidence ellipsoid of the evaluated flux parameters and which is equal to the

1  
2  
3 1 determinant of the covariance matrix of the flux parameters. Expressions for  $IC$  and  $D$  are as  
4  
5  
6 2 follows:

$$3 \quad IC = \frac{1}{\sqrt[n]{D}} \quad D = \det(Cov(P)) \quad (3)$$

4  
5 The free flux parameters ( $P$ ) and the NMR intensities ( $I$ ) are related through a non-linear  
6  
7 relationship of the form  $I = h(P)$

8  
9 The NMR2Flux software previously developed in our group evaluates flux parameters  
10  
11 iteratively from the labeling data. All computations of  $IC$  are reported with respect to a reference  
12  
13 experiment with 10% U- $^{13}\text{C}$  glucose as the only labeled substrate. Various combinations of U-  
14  
15  $^{13}\text{C}$  glucose, 1- $^{13}\text{C}$  glucose and naturally labeled glucose were examined for their ability to  
16  
17 provide an improved labeling data set.  
18  
19  
20  
21  
22  
23  
24  
25  
26  
27  
28  
29  
30

## 31 **Results and Discussion**

### 32 *Metabolic fluxes calculated using conventional metabolic flux analysis*

33  
34  
35  
36  
37  
38 15 The fermentation data for the anaerobic growth of strain W3110 on glucose was used to  
39  
40 obtain the measured fluxes shown in Table 1. Acetate, ethanol, succinate, and lactate were the  
41  
42 major fermentation products. Ethanol and acetate production was high compared to other  
43  
44 fermentation products, as this partition of carbon is known to be favorable to support redox  
45  
46 balance and generation of ATP in the absence of external electron acceptors.<sup>34</sup> Metabolite  
47  
48 balancing, referred to here as conventional metabolic flux analysis (c-MFA), was then used to  
49  
50 calculate the intracellular fluxes by making use of the measured fluxes (Table 1) and the  
51  
52 stoichiometric model described in Supplementary Table 3. The following assumptions were  
53  
54 made in constructing the model. The TCA cycle was assumed to be incomplete, and thus  
55  
56  
57  
58  
59  
60

1  
2  
3 1 operating as two (oxidative and reductive) branches.<sup>35</sup> The glyoxylate shunt pathway has also  
4  
5 2 been reported inactive during glucose metabolism due to repression by this carbon source<sup>13,36</sup>  
6  
7  
8 3 and hence was not considered in the model. Fluxes are considered to be net fluxes because c-  
9  
10 4 MFA cannot account for reaction reversibility. These assumptions yielded an exactly determined  
11  
12 5 metabolic model. The condition number of the stoichiometric matrix consisting of mass balances  
13  
14 6 of intracellular metabolites was found to be 8 (Supplementary Table 2), indicating a well-  
15  
16 7 conditioned matrix.<sup>1</sup> Measurements of glucose utilization, synthesis of fermentation products,  
17  
18 8 and biomass formation (Table 1) were used to calculate the intracellular fluxes, with a selected  
19  
20 9 group of them shown in Table 2 (see Supplementary Table 3 for all calculated fluxes). The  
21  
22 10 fluxes are reported relative to 100 moles of glucose and standard deviations were estimated using  
23  
24 11 a Monte Carlo simulation approach as described in *Materials and Methods*.

25  
26  
27  
28  
29 12 The flux through pyruvate formate lyase (*pfl*), an enzyme that catalyzes the conversion of  
30  
31 13 pyruvate to acetyl-CoA and formate, was found to be  $144.8 \pm 10.5$  (Table 2) suggesting very high  
32  
33 14 activity under anaerobic conditions. Most of the produced formate was secreted to the  
34  
35 15 extracellular medium ( $135.9 \pm 3.8$ ), with only about 6% converted to carbon dioxide and  
36  
37 16 hydrogen ( $8.9 \pm 11.2$ ) by the action of formate hydrogenlyase (*fhl*) (Table 2). The combined flux  
38  
39 17 for the conversion of acetyl-CoA-to-ethanol and acetyl-CoA-to-acetate was found to be  
40  
41 18  $133.9 \pm 10.5$ . The flux through the other major pathway consuming pyruvate (i.e. conversion to  
42  
43 19 lactate through *ldh*) was much lower ( $11.6 \pm 4.6$ ). The higher flux through *pfl* is advantageous as  
44  
45 20 the production of equimolar amounts of ethanol and acetate from glucose is the most ATP  
46  
47 21 efficient anaerobic mode producing three molecules of ATP per molecule of glucose fermented  
48  
49 22 in a redox balanced manner.<sup>34</sup> The succinate flux was found to be very small ( $5.5 \pm 0.8$ ).  
50  
51  
52  
53  
54  
55  
56  
57  
58  
59  
60

1 While most fluxes in the Embden-Meyerhof-Parnas (EMP) pathway exhibited small  
2 standard deviations (11.2), the standard deviation of the first step (catalyzed by the enzyme  
3 phosphoglucose isomerase) was about three times larger (33.7) (Table 2). This resulted in a very  
4 large coefficient of variation ( $CV = \text{standard deviation/average} \times 100$ ) of 61% for the  
5 phosphoglucose isomerase flux (*pgi*). A substantial flux was calculated for the pentose phosphate  
6 pathway (PPP) (Table 2), suggesting that this pathway may be active during anaerobic  
7 fermentation of glucose, which is consistent with previous findings.<sup>7,17,23</sup> However, all fluxes in  
8 the PPP, including that through its oxidative branch (ox-PPP, flux *zwf*: conversion of glucose-6-  
9 phosphate to 6-phosphogluconolactone, catalyzed by glucose-6-phosphate dehydrogenase),  
10 exhibited large standard deviations (Table 2) with average CV of 78.7 % (Supplementary Table  
11 3). When taken together, the above results indicate a poor resolution of metabolic fluxes at  
12 glucose-6-phosphate, a key metabolic node that determines the partition of carbon flux between  
13 EMP and PPP.

14 The other group of reactions with large error in estimated fluxes were associated with  
15 fermentative pathways, primarily those involved in the conversion of formate to carbon dioxide  
16 and hydrogen (catalyzed by the enzyme FHL, *fhl* flux) and the carbon dioxide evolution flux  
17 (Table 2 and Supplementary Table 3). As in the case of glucose-6-phosphate, this result indicates  
18 poor resolution of flux partition at the formate node.

### 20 ***Metabolic flux analysis using uniformly (U)-<sup>13</sup>C-labeled glucose***

21 <sup>13</sup>C labeling data provide additional measurements that can be used to extend the analysis  
22 conducted with c-MFA, thus obtaining a more comprehensive characterization of metabolic  
23 fluxes and network topology.<sup>5,12</sup> To this end, a <sup>13</sup>C labeling experiment was carried out using



1  
2  
3 1 10% uniformly (U)-labeled- $^{13}\text{C}$  glucose and 90% naturally labeled glucose (referred to as U- $^{13}\text{C}$   
4  
5  
6 2 experiment). Exponentially growing cells were harvested and the protein extracted and  
7  
8 3 hydrolyzed. A two-dimensional [ $^1\text{H}$ ,  $^{13}\text{C}$ ] Heteronuclear Single-Quantum Coherence (HSQC)  
9  
10 4 spectrum of the proteinogenic amino acids thus obtained was acquired (Figure 2A). Carbon  
11  
12 5 atoms of 13 amino acids were identified by their unique  $^{13}\text{C}/^1\text{H}$  chemical shifts, distinctive  
13  
14 6 coupling patterns, and J-coupling constants ( $J_{\text{CC}}$ ).<sup>30, 37</sup> Upon quantification of peak integrals 91  
15  
16 7 peak intensities from 31 sets of relative isotopomer abundances were obtained, corresponding to  
17  
18 8 31 observed carbon atoms of proteinogenic amino acids, as shown in Supplementary Table 4.

19  
20  
21  
22 9 The reactions corresponding to the TCA cycle and the glyoxylate shunt were now  
23  
24 10 included in the stoichiometric model and reaction reversibility was also accounted for. The new  
25  
26 11 model contains 40 net reactions, 11 reversible reactions and 1 scrambling reaction: i.e. a total of  
27  
28 12 52 fluxes to be estimated (Supplementary Table 3). Assuming pseudo steady state, 21  
29  
30 13 intracellular metabolite balances contribute to 21 linear constraints. Hence, the model has 31  
31  
32 14 parameters including 11 reversibility parameters, 1 scrambling parameter, and 19 independent  
33  
34 15 flux parameters. The fluxes corresponding to the incorporation of 12 precursor metabolites into  
35  
36 16 biomass were estimated using data on biomass yield and biomass composition reported in the  
37  
38 17 literature (Table 1). The extracellular fluxes of glucose, lactate and succinate were obtained from  
39  
40 18 the experimental measurements. The extracellular fluxes of formate and the combined flux of  
41  
42 19 acetate-ethanol were included in the chi-square ( $\chi^2$ ) criterion for the estimation of fluxes.

43  
44  
45  
46 20 The software NMR2Flux<sup>28,30</sup> was used to obtain a new set of intracellular fluxes (Table  
47  
48 21 2, U- $^{13}\text{C}$ -MFA column) based on the above-described model, isotopomer abundances, and  
49  
50 22 extracellular and biomass flux measurements. In general, there was a good fit between the  
51  
52 23 simulated and experimental measurements of isotopomer abundances (Figure 2B) and calculated  
53  
54  
55  
56  
57  
58  
59  
60

1 and measured formate and acetate-ethanol fluxes (Tables 1 and 2). The total  $\chi^2$  was 650 (Table  
2) with an average difference between simulated and experimental intensities of 0.019. Out of 91  
NMR measurements, 27 measurements from asp- $\alpha$ , ile-  $\alpha$ , phe-  $\alpha$ , leu-  $\alpha$ , tyr- $\beta$  and tyr- $\delta$   
contributed to 60% of the total  $\chi^2$ . Since most of these peaks were analyzed by spectral  
deconvolution, their high contribution to  $\chi^2$  is most likely due to the low standard deviations  
assumed for these peaks rather than an inappropriate metabolic model.

The most salient features of the calculated fluxes are as follows. A very low flux through  
2-oxoglutarate dehydrogenase ( $0.57 \pm 0.96$ ; CV = 170; Supplementary Table 3) indicates that the  
TCA cycle operates as two branches to fulfill demand for precursor metabolites for biomass  
synthesis, in agreement with previous studies.<sup>7,17,23</sup> The relative flux through the oxidative  
branch of the PPP (ox-PPP) was found to be  $40 \pm 30$  (Table 2). Using semi-quantitative NMR  
analysis, Szyperski *et al.*<sup>7</sup> estimated that 20 to 30% of glucose is converted to PEP via the PPP in  
*E. coli* B, which appears to be similar to the value calculated here via U-<sup>13</sup>C-MFA. Additionally,  
they found that less than 20% of R5P originates from G6P via ox-PPP. However, it is not  
possible to compare these results directly with the net fluxes obtained by c-MFA or <sup>13</sup>C-MFA  
because rapid equilibration of pentose pool in addition to rapid exchange via transketolase and/or  
transaldose can lead to similar carbon labeling pattern for various intracellular flux distributions.  
Using the same NMR data and a more comprehensive <sup>13</sup>C flux analysis, Schmidt *et al.*<sup>23</sup> found  
the flux through ox-PPP to be 77%. However, the extracellular flux measurements for the  
fermentation products were taken from a different study in the literature.<sup>24</sup> Moreover, the  
demand for NADPH and precursor metabolites generated by PPP (and used in biomass  
synthesis) should be low under fermentative conditions due limited cell growth (about 90% of

1 the carbon is recovered as fermentation products: see Table 1). Hence, a low flux through PPP  
2 appears more reasonable.

3 The glyoxylate shunt is often assumed to be inactive in glucose grown cultures as this  
4 pathway is subjected to catabolite repression by glucose.<sup>36</sup> However, the glyoxylate shunt was  
5 found to be active in wild-type *E. coli* under conditions of glucose hunger in a slow-growing  
6 continuous culture<sup>22</sup> and under glucose-excess batch conditions in a phosphoglucose isomerase  
7 mutant.<sup>10,18</sup> Moreover, while repressed by glucose in K12 strains, the glyoxylate cycle appears to  
8 be expressed in *E. coli* B during growth on glucose.<sup>38,39</sup> Although comprehensive, all the  
9 aforementioned studies investigated the metabolism of glucose under aerobic conditions. Our U-  
10 <sup>13</sup>C-MFA indicates that the flux through the glyoxylate shunt during the anaerobic fermentation  
11 of glucose is very low (2.34) with a large standard deviation (1.48) that reaches 63% of the  
12 calculated value (Supplementary Table 3). This result appears to indicate that the glyoxylate  
13 shunt is unlikely to be active during fermentative growth of *E. coli* W3110 on glucose.

### 15 ***Identifiability analysis***

16 While the results of U-<sup>13</sup>C-MFA were superior to those obtained with c-MFA (see  
17 previous sections), the estimated fluxes for PPP and some fermentative reactions still exhibited  
18 large standard deviations (Table 2). Consequently, the flux split ratio at several nodes such as the  
19 glucose 6-phosphate and formate were not well resolved. These findings indicate that the  
20 labeling measurements from the U-<sup>13</sup>C experiment do not provide enough information to  
21 estimate the above-mentioned fluxes. The large standard deviations associated with the ox-PPP  
22 flux are in agreement with previous observations by Dauner *et al.*<sup>40</sup> who found large confidence  
23 interval for ox-PPP flux in their MFA of aerobic metabolism of *B. subtilis* using U-<sup>13</sup>C glucose.

1  
2  
3  
4 1 However, Schmidt *et al.*<sup>41</sup> were able to accurately estimate the ox-PPP flux using a mixture of 1-  
5  
6 2 <sup>13</sup>C glucose and 6-<sup>13</sup>C glucose to characterize the aerobic metabolism of glucose in a  
7  
8 3 glucoamylase-producing strain of *Aspergillus niger*. In general, it has been well documented in  
9  
10 4 the literature that a statistical analysis is required to identify the best mixture of labeled carbon  
11  
12 5 that supports good estimates of intracellular fluxes.<sup>12,21,32,42</sup> Specifically, the fluxes in the PPP  
13  
14 6 and the flux split ratio at the glucose-6-phosphate node can be well resolved using 1st position  
15  
16 7 labeled glucose.<sup>21,32,41,42</sup> Therefore, we conducted an identifiability analysis to determine the  
17  
18 8 impact of using 1-<sup>13</sup>C-labeled glucose in combination with U-<sup>13</sup>C-labeled and naturally labeled  
19  
20 9 glucose on flux identifiability compared to the flux values estimated from the 10% U-<sup>13</sup>C  
21  
22 10 labeling experiment. To this end, we used the fluxes obtained via U-<sup>13</sup>C-MFA and employed  
23  
24 11 identifiability analysis based on linear statistics<sup>32</sup> to obtain synthetic measurement data sets as  
25  
26 12 surrogates for labeling experiments.<sup>23,40,41</sup> Figure 3 depicts the information content (*IC*, which  
27  
28 13 indicates the statistical quality of the experiment) for various combinations of 1-<sup>13</sup>C- and U-<sup>13</sup>C-  
29  
30 14 labeled glucose relative to the reference experiment with 10% U-<sup>13</sup>C-labeled glucose. In  
31  
32 15 computation of *IC*, the statistical quality of all the flux parameters was taken into account. The  
33  
34 16 maximum improvement in *IC* (2.2-fold) was observed with the combination of 5% U-<sup>13</sup>C  
35  
36 17 glucose and 95% 1-<sup>13</sup>C glucose. This overall improvement is primarily due to a very large  
37  
38 18 improvement in statistical quality of the ox-PPP flux when 1-<sup>13</sup>C glucose is used in combination  
39  
40 19 with U-<sup>13</sup>C glucose as labeled substrate (Figure 4). Using these simulations we determined that a  
41  
42 20 labeled substrate mixture containing 25% of 1-<sup>13</sup>C and 10% of U-<sup>13</sup>C glucose (balance naturally  
43  
44 21 labeled glucose) supports adequate estimation of the PPP fluxes along with high overall  
45  
46 22 statistical quality while maintaining the use of labeled substrates at a reasonable level (e.g. less  
47  
48 23 than 40% of the total substrate).

1  
2  
3 1  
4  
5  
6 2**Metabolic flux analysis using a complex mixture of 1-<sup>13</sup>C and U-<sup>13</sup>C-labeled glucose**

7  
8 3  
9  
10 4  
11  
12 5  
13  
14  
15 6  
16  
17 7  
18  
19 8  
20  
21 9  
22  
23 10  
24  
25 11  
26  
27  
28  
29 12  
30  
31  
32  
33  
34  
35  
36  
37  
38  
39  
40  
41  
42  
43  
44  
45  
46  
47  
48  
49  
50  
51  
52  
53  
54  
55  
56  
57  
58  
59  
60

Based on the results of the identifiability analysis presented above, a labeling experiment was carried out with a mixture of 10% U-<sup>13</sup>C glucose, 25 % 1-<sup>13</sup>C glucose, and 65% naturally labeled glucose (referred to as 1-U-<sup>13</sup>C experiment). The flux map thus obtained is shown in Figure 5 (see also Table 2 and Supplementary Table 3). In agreement with the *in silico* analysis, the statistical quality of calculated fluxes was significantly improved. All fluxes in the PPP, including the ox-PPP and backward fluxes in reversible reactions, showed improvements in the 1-U-<sup>13</sup>C-MFA. The same was observed for the EMP, anaplerotic reactions, and the TCA cycle (Figure 5; see also Table 2 and Supplementary Table 3). The largest improvement in estimated fluxes was observed at the glucose-6-phosphate and formate nodes, which are discussed in detail below.

13  
14  
15  
16  
17  
18  
19  
20  
21  
22  
23  
24  
25  
26  
27  
28  
29  
30  
31  
32  
33  
34  
35  
36  
37  
38  
39  
40  
41  
42  
43  
44  
45  
46  
47  
48  
49  
50  
51  
52  
53  
54  
55  
56  
57  
58  
59  
60

Glucose-6-phosphate is a very important metabolic node as it determines the distribution of carbon between the PP and EMP pathways by converting glucose-6-phosphate to fructose-6-P (enzyme phosphoglucose isomerase, *pgi* flux) or 6-phosphogluconolactone (enzyme glucose-6-phosphate dehydrogenase, ox-PPP, *zwf* flux). The standard deviation of the flux through phosphoglucose isomerase decreased by 10 times, with an estimated value 1.3 higher in the 1-U-<sup>13</sup>C experiment (Figure 5 and Table 2). When both changes were taken into account, the coefficient of variation in the 1-U-<sup>13</sup>C experiment was only 7% of that observed in the U-<sup>13</sup>C experiment (Table 2). The same decrease in standard deviation was observed for the estimated flux through glucose-6-phosphate dehydrogenase, the committed step of the ox-PPP (Figure 5). In this case the CV decrease to around 80% of its value in the U-<sup>13</sup>C experiment. When the results for phosphoglucose isomerase and glucose-6-phosphate dehydrogenase are combined, a

1 very large improvement in flux resolution at the glucose-6-phosphate node is realized: i.e. an  
2 average decrease in standard deviation and coefficient of variation of 10- and 2-fold,  
3 respectively.

4 Formate is another important metabolic node under fermentative conditions as this  
5 metabolite can be either exported to the extracellular medium via transporters FocA and FocB or  
6 disproportionated to carbon dioxide and hydrogen by the action of the enzyme formate  
7 hydrogenlyase (FHL).<sup>34,35</sup> While the net efflux of formate can be estimated based on the  
8 measurement of formate accumulated in the extracellular medium, the *fhl* flux cannot be  
9 calculated based on measurements of carbon dioxide or hydrogen evolution; the latter due to the  
10 involvement of carbon dioxide in many other metabolic pathways and the recycling of hydrogen  
11 by the action of hydrogenases.<sup>35</sup> As previously discussed, the estimated *fhl* flux was very poor in  
12 c-MFA, with a standard deviation that exceeded the calculated value of the flux (Table 2). While  
13 the U-<sup>13</sup>C-MFA improved the quality of the estimated flux, its coefficient of variation was still  
14 very large representing 80% of the calculated flux (Table 2). As in the case of glucose-6-  
15 phosphate, the use of a complex mixture of 1-<sup>13</sup>C- and U-<sup>13</sup>C-labeled glucose allowed a better  
16 resolution of fluxes at the formate node (Figure 5 and Table 2). For example, the coefficient of  
17 variation for the *fhl* flux decreased from 79% to 37 %.

18 The estimated flux distribution was used to calculate the overall redox balance by  
19 considering generation and consumption of reducing equivalents in biomass formation, oxidative  
20 pentose phosphate pathway, isocitrate dehydrogenase, glyceraldehydes 3-phosphate  
21 dehydrogenase, acetaldehyde/alcohol dehydrogenase and lactate dehydrogenase. According to  
22 our calculations, the net flux from NADPH to NADP was negative (-14.7), but this is probably

1  
2  
3 1 compensated by the action of transhydrogenases, which interconvert NADH and NADPH.<sup>18</sup> The  
4  
5 2 transhydrogenase flux converting NADH into NADPH was therefore estimated to be 14.7.  
6  
7

8 Unlike the case of aerobic conditions, under fermentative conditions it is possible to  
9  
10 4 estimate metabolic production of ATP without assuming a P/O ratio. The total ATP production  
11  
12 5 in central carbon metabolism was found to be 152.9 mole of ATP per 100 mole of glucose  
13  
14 6 consumed. Several cellular processes require the consumption of ATP for maintenance such as  
15  
16 7 constant electrochemical gradients across membranes, futile cycles, and turnover of  
17  
18 8 macromolecules without net generation of cell biomass. The ATP consumption for maintenance  
19  
20 9 was found to be 128.2 mole ATP per 100 mole glucose consumption.  
21  
22  
23  
24  
25  
26

### 27 11 ***Topology of the metabolic network and identifiability of extracellular fluxes from labeling*** 28 29 12 ***data*** 30

31  
32 13 Since the generic nature of our flux evaluation methodology allows easy modification of  
33  
34 14 the metabolic network, the topology of the network was further investigated. To this end, two  
35  
36 15 general areas of the original network were modified: i) the glyoxylate shunt was excluded and  
37  
38 16 the TCA cycle modified to operate as two independent branches ii) the Entner-Doudoroff (ED)  
39  
40 17 pathway (*ed*) and the malic enzyme reaction (*me*) were added to the network. The exclusion of  
41  
42 18 the glyoxylate shunt and operation of the TCA cycle as two branches did not affect the  $\chi^2$  and no  
43  
44 19 significant changes were observed in the resolution of fluxes in the EMP, PPP or fermentative  
45  
46 20 pathways (Table 2). The only significant changes were observed in anaplerotic and TCA cycle  
47  
48 21 fluxes, which were better estimated in this scenario: i.e. the average CV decreased by 40% (data  
49  
50  
51 22 not shown).  
52  
53  
54  
55  
56  
57  
58  
59  
60

1  
2  
3  
4  
5  
6  
7  
8  
9  
10  
11  
12  
13  
14  
15  
16  
17  
18  
19  
20  
21  
22  
23  
24  
25  
26  
27  
28  
29  
30  
31  
32  
33  
34  
35  
36  
37  
38  
39  
40  
41  
42  
43  
44  
45  
46  
47  
48  
49  
50  
51  
52  
53  
54  
55  
56  
57  
58  
59  
60

1 When the ED pathway and the malic enzyme reaction were added to the metabolic  
2 network, a significant decrease in  $\chi^2$  was observed, although the quality of most estimated fluxes  
3 remained almost unchanged, as can be judged by their standard deviations (and coefficients of  
4 variation) (Table 2 and Supplementary Table 3). In this scenario, the calculated flux for the ED  
5 pathway was only  $1.3 \pm 1.5$ , which is clearly negligible and statistically unidentifiable (CV =  
6 121%). The flux through the malic enzyme reaction (*me* flux), however, was found to be  
7 considerably large ( $65.5 \pm 21.2$ ) and brought about significant changes around the  
8 phosphoenolpyruvate-pyruvate node. First, there was a 10-fold increase in the conversion of PEP  
9 to OAA to MAL, which is supported by 10-fold increase in the *ppc* and *mdh* fluxes by PEP  
10 carboxylase and malate dehydrogenase (Table 2). Along with this, there was a 5-fold decrease in  
11 the pyruvate kinase flux (*pyk*). Taken together, this scenario indicates that a large fraction of the  
12 pyruvate is generated by the combined action of PEP carboxylase, malate dehydrogenase, and  
13 malic enzyme, thus by-passing pyruvate kinase. This three-step conversion of PEP to PYR  
14 involves carboxylation and decarboxylation reactions, thus affecting the labeling pattern of  
15 amino acids and explaining the better  $\chi^2$  (Table 2). However, the high-energy bond of PEP is  
16 wasted and no ATP is generated. In contrast, the conversion of PEP to PYR catalyzed by  
17 pyruvate kinase generates one molecule of ATP (Figure 1). In conclusion, while the inclusion of  
18 *me* flux provides a better fit of the experimental data (i.e. lower  $\chi^2$ ) the calculated fluxes around  
19 the phosphoenolpyruvate-pyruvate node do not reflect a metabolically feasible scenario due to its  
20 low energy efficiency. That is, the ATP generated without the malic enzyme reaction was 152.9  
21 mole per 100 mole glucose, but upon inclusion of the *me* flux it significantly decreased to 83.9  
22 mole per 100 mole of glucose.



1  
2  
3  
4 1 Another aspect investigated was the possibility of estimating intracellular fluxes from  
5  
6 2 labeling data alone (i.e. without including extracellular flux measurements in the  $\chi^2$  criterion). In  
7  
8 3 comprehensive  $^{13}\text{C}$ -MFA, intracellular fluxes are estimated by using the NMR measurements  
9  
10 4 along with extracellular measurements, both being included in the  $\chi^2$  criterion (see *Materials and*  
11  
12 5 *Methods* for details). The labeling patterns *per se* are dependent on intracellular fluxes only and  
13  
14 6 do not contain information about extracellular fluxes. However, since intracellular fluxes are  
15  
16 7 related to extracellular fluxes through stoichiometric constrains, the accurate determination of  
17  
18 8 intracellular fluxes would result in accurate determination of extracellular fluxes. To test the  
19  
20 9 hypothesis of whether extracellular fluxes can be estimated from labeling measurements alone,  
21  
22 10 formate and ethanol-acetate measurements were not included in the  $\chi^2$  criterion and the results  
23  
24 11 are shown in Table 2 (see also Supplementary Table 3). The calculated flux values in ethanol-  
25  
26 12 acetate production are very similar in both cases of inclusion and exclusion of two measurements  
27  
28 13 in the  $\chi^2$  criterion (Equation “(2)”). The acetate-ethanol flux was estimated to be  $144.4 \pm 5$  with  
29  
30 14 inclusion of both ethanol-acetate and formate extracellular measurements and it was  $146.3 \pm 6.9$   
31  
32 15 without inclusion of them. This result indicates that the acetate-ethanol combined flux can indeed  
33  
34 16 be estimated from the labeling information alone.

35  
36  
37  
38  
39  
40  
41 17 Unlike the acetate-ethanol flux, the fluxes around the formate node (i.e. conversion of  
42  
43 18 formate to carbon dioxide and hydrogen by FHL, formate export, and carbon dioxide evolution)  
44  
45 19 were all associated with large standard deviations and coefficients of variation (Table 2 and  
46  
47 20 Supplementary Table 3). Moreover, when compared to experimental measurements, the net  
48  
49 21 formate (export) flux was poorly estimated:  $78.5 \pm 45.6$  (Table 2) compared to a measured value  
50  
51 22 of  $135.9 \pm 3.8$  (Table 1). We then conclude that the fluxes around the formate node cannot be  
52  
53 23 estimated in the absence of formate measurement.  
54  
55  
56  
57  
58  
59  
60

1 To investigate why the fluxes around the formate node are associated with large standard  
2 deviations (and why formate production can not be estimated from labeling data alone), a  
3 linearized method was used to estimate the effect of the ox-PPP, PEP carboxylase and TCA  
4 cycle fluxes on the SD of the formate-related fluxes (i.e. *fhl* flux, formate export, and carbon  
5 dioxide evolution) (Figure 6). These reactions/pathways were chosen because of their  
6 involvement in carbon dioxide metabolism, which link them to the reactions involved in the  
7 formate node. The simulations predict that the TCA and PEP carboxylase fluxes do not have a  
8 significant impact on the standard deviation of the formate flux but the ox-PPP flux significantly  
9 affected it (Figure 6A).

10 Theoretically, the fluxes of *fhl* and formate production in the branch pathways from the  
11 formate node could be estimated if the enrichment of CO<sub>2</sub> and formate is different. When 10%  
12 U-<sup>13</sup>C glucose and 90% unlabeled glucose were used, the enrichment of the carbon in formate  
13 and CO<sub>2</sub> would be the same to 11% (10% from U-<sup>13</sup>C and 1% from natural abundance), and thus  
14 the fluxes in extracellular formate production and *fhl* flux are unidentifiable. On the other hand,  
15 using a mixture of 10% U-<sup>13</sup>C glucose and 25% 1-<sup>13</sup>C glucose, the carbon enrichment in formate  
16 and CO<sub>2</sub> will be different through metabolic pathways. Of the fluxes involved with the formate  
17 node, the ox-PPP flux (*zwf*) affected the most the *fhl* flux and the carbon dioxide evolution flux  
18 (Figure 6B). Since the flux through ox-PPP affects the fraction of carbon dioxide originating  
19 from the first carbon of glucose, higher ox-PPP fluxes result in higher enrichment of carbon  
20 dioxide. However, the small flux in *zwf* (3.4±1.3) from 1-U-<sup>13</sup>C-MFA results in similar  
21 enrichment of formate and carbon dioxide as shown in Figure 6B.

## 22 23 **Conclusions**

1  
2  
3 1  
4  
5 2 Comprehensive metabolic flux analysis using a mixture of differently labeled glucose led  
6  
7  
8 3 to a superior estimation of metabolic fluxes during the fermentation of glucose by *Escherichia*  
9  
10 4 *coli* when compared to the use of conventional flux analysis or only U-<sup>13</sup>C glucose as the  
11  
12 5 substrate. An identifiability analysis indicated that a mixture of 10% U-<sup>13</sup>C glucose, 25 % 1-<sup>13</sup>C  
13  
14 6 glucose, and 65% naturally labeled glucose would significantly improve the statistical quality of  
15  
16 7 calculated fluxes over other labeling schemes. The most significant improvements were observed  
17  
18 8 for fluxes involved in two metabolic nodes: the glucose-6-P node, which determines carbon  
19  
20 9 partitioning between the Embden-Meyerhof-Parnas and pentose phosphate pathways, and the  
21  
22 10 formate node, which determines the fate of formate between export and oxidation to CO<sub>2</sub> and  
23  
24 11 hydrogen. The study of network topology indicated that the inclusion of the Entner-Doudoroff  
25  
26 12 pathway, the malic enzyme, or the glyoxylate shunt does not significantly affect the value or  
27  
28 13 quality of estimated fluxes. It was also concluded that while the combined acetate-ethanol flux  
29  
30 14 can be estimated from the labeling information alone, the fluxes around the formate node  
31  
32 15 couldn't be estimated in the absence of a formate measurement.  
33  
34  
35  
36  
37  
38  
39  
40

## 41 **Acknowledgements**

42  
43  
44  
45

46 19 This work was supported by grants from the U.S. National Science Foundation (EEC-  
47  
48 20 0813570 and BES-0331388/BES-0601549).  
49  
50  
51  
52

## 53 **Supplementary Material Statement**

54

55 23 Table S1. Metabolic pathways and involved enzymes, EC numbers, and gene names.  
56  
57  
58  
59  
60

1  
2  
3 1 Table S2. Stiochiometric matrix (G) of metabolic network of *E.coli* used in conventional  
4  
5  
6 2 metabolic flux analysis  
7

8 3 Table S3. Metabolic reactions and flux values quantified by c-MFA and  $^{13}\text{C}$  based MFA  
9

10 4 Table S4. Simulated and experimentally measured NMR intensity from  $\text{U-}^{13}\text{C}$ -MFA and  $1\text{-}^{13}\text{C}$ -  
11  
12 MFA  
13  
14  
15  
16

### 17 **Abbreviations**

18  
19  
20 8 AcCoA, acetyl coenzyme A; ACK, acetate kinase; ADH, alcohol dehydrogenase; AKG,  $\alpha$ -  
21  
22 9 ketoglutarate; ED, Entner-Doudoroff pathway; EMP, Embden-Meyerhof-Parnas; E4P, erythrose-  
23  
24 10 4-phosphate; FHL, formate hydrogen-lyase; FUM, fumarate; F6P, fructose-6-phosphate; G3P,  
25  
26 11 combined pool of triose-3-phosphate; G6P; glucose-6-phosphate; HPLC, high performance  
27  
28 12 liquid chromatography; GOX, glyoxylate; HSQC, Heteronuclear Single-Quantum Coherence;  
29  
30 13 ICIT, isocitrate; MAL, malate; MFA, metabolic flux analysis; non-ox-PPP, non-oxidative branch  
31  
32 14 of the pentose phosphate pathway; OAA, oxaloacetate; ox-PPP, oxidative branch of the pentose  
33  
34 15 phosphate pathway; PEP, phosphoenolpyruvate; PFL, pyruvate formate-lyase; PGLU, 6-  
35  
36 16 phospho-D-gluconate; PGLUL, D-glucono- $\delta$ -lactone-6-phosphate; PP, pentose phosphate; PPP,  
37  
38 17 pentose phosphate pathway; PYK, pyruvate kinase; PYR, pyruvate; RL5P, ribulose-5-phosphate;  
39  
40 18 R5P, ribose-5-phosphate; S7P, sedoheptulose-7-phosphate; SUCC, succinate; TCA, tricarboxylic  
41  
42 19 acid; X5P, xylose-5-phosphate  
43  
44  
45  
46  
47  
48  
49  
50  
51  
52  
53  
54  
55  
56  
57  
58  
59  
60

## 1 **Figure Captions**

2

3

4

5

6

7

8 **Figure 1.** Pathways involved in the synthesis of fermentation products, precursor metabolites,

9 ATP, and reducing equivalents during the fermentative utilization of glucose by *E. coli*.

10 Enzyme(s) catalyzing shown reaction(s) are as follows. Glucose transport and phosphorylation:

11 [1], phosphoenolpyruvate-dependent phosphotransferase system (PTS). EMP: [2],

12 phosphoglucose isomerase; [3], combined reactions by 6-phosphofructokinase, fructose

13 bisphosphate aldolase and triose phosphate isomerase; [4], glyceraldehyde-3-phosphate

14 dehydrogenase, phosphoglycerate kinase, phosphoglycerate mutases and enolase; and [5],

15 pyruvate kinase. ox-PPP: [6], glucose 6-phosphate dehydrogenase; [7], 6-

16 phosphogluconolactonase; and [8], 6-phosphogluconate dehydrogenase. non-ox-PPP: [9],

17 ribulose phosphate 3-epimerase; [10], ribose-5-phosphate isomerases; [11], transketolases; and

18 [12], transaldolases. Oxidative and reductive branches of the TCA cycle: [13], citrate synthase

19 and aconitases; [14], isocitrate dehydrogenase; [15], malate dehydrogenase and fumarases; and

20 [16], fumarate reductase. Anaplerotic reaction: [17], phosphoenolpyruvate carboxylase. Pyruvate

21 dissimilation: [18], pyruvate formate-lyase. Fermentation: [19], lactate dehydrogenase; [20],

22 formate hydrogen-lyase; [21], phosphate acetyltransferase; [22], acetate kinase; [23],

23 alcohol/acetaldehyde dehydrogenase. Cell growth: [24], synthesis of cell mass from precursor

24 metabolites (\*), ATP, and reducing equivalents. See the detail description in Supplementary

25 Table S1 and S3 and the list of abbreviations.

26

27

28

29

30

31

32

33

34

35

36

37

38

39

40

41

42

43

44

45

46

47

48

49

50

51

52

53

54

55

56

57

58

59

60

1 **Figure 2.** Two-dimensional [ $^{13}\text{C}$ ,  $^1\text{H}$ ] HSQC spectra of hydrolyzed extracts of wild type *E. coli*  
2 K12 strain W3110 grown on a mixture of 10% U- $^{13}\text{C}$  and 90% naturally labeled glucose (A) and  
3 comparison of experimental and simulated NMR intensities of proteinogenic amino acids (B).  
4 The solid line represents a linear fitting as shown in the equation while the short dashed lines  
5 illustrate the 95% confidence intervals.

6  
7 **Figure 3.** Effect of the use of 1- $^{13}\text{C}$ -labeled glucose in combination with U- $^{13}\text{C}$ -labeled on flux  
8 identifiability as represented by the information content (*IC*). The *IC*, which takes into account  
9 the statistical quality of all the flux parameters, is shown relative to the reference experiment  
10 [10% U- $^{13}\text{C}$ ].

11  
12 **Figure 4.** Identifiability of the ox-PPP flux for various combinations of 1- $^{13}\text{C}$ - and U- $^{13}\text{C}$ -labeled  
13 glucose, expressed relative to the reference experiment with 10% U- $^{13}\text{C}$ -labeled glucose.

14  
15 **Figure 5.** *In vivo* distribution of metabolic fluxes for wild-type *E. coli* K12 strain W3110  
16 calculated using 10% U- $^{13}\text{C}$ -labeled, 25% 1- $^{13}\text{C}$ -labeled, and 65% naturally labeled glucose  
17 (lower values) compared to fluxes using 10% U- $^{13}\text{C}$  glucose (upper values). The values in  
18 parentheses represent standard deviations. Estimated fluxes represent the molar percentages of an  
19 average specific glucose uptake rates of  $30.7 \pm 2.8$  mmol/gCDW/h. Arrowheads indicate the  
20 direction of fluxes shown as positive (negative fluxes are in opposite direction to that of  
21 arrowheads). See Supplementary Table S1 for details about these pathways and nomenclature  
22 for abbreviations.

1  
2  
3 1 **Figure 6.** Formate flux identifiability. (A) Effect of *zwf*, *akgdh* and extent of reversibility of *ppc*  
4  
5 2 on *fhl* flux standard deviations in 1-U-<sup>13</sup>C experiment. Linearized method was used to estimate  
6  
7  
8 3 standard deviations of *fhl*. (B) Effect of *zwf* flux on CO<sub>2</sub> and formate enrichment, and the SD of  
9  
10 4 *fhl* flux in 1-<sup>13</sup>C experiment. Linearized method was used to estimate standard deviations of *fhl*.  
11  
12  
13  
14  
15  
16  
17  
18  
19  
20  
21  
22  
23  
24  
25  
26  
27  
28  
29  
30  
31  
32  
33  
34  
35  
36  
37  
38  
39  
40  
41  
42  
43  
44  
45  
46  
47  
48  
49  
50  
51  
52  
53  
54  
55  
56  
57  
58  
59  
60

For Peer Review

1 **Tables**

2 **Table 1.** Metabolic fluxes for the synthesis of fermentation products and biomass formation  
 3 obtained from experimental data in c-MFA, U-<sup>13</sup>C-MFA, and 1-U-<sup>13</sup>C-MFA.

|                          | c-MFA/U- <sup>13</sup> C-MFA | 1-U- <sup>13</sup> C-MFA |
|--------------------------|------------------------------|--------------------------|
| Biomass synthesis        |                              |                          |
| G6P                      | 0.46 ± 0.05                  | 0.44 ± 0.04              |
| F6P                      | 0.16 ± 0.02                  | 0.15 ± 0.02              |
| R5P                      | 2.02 ± 0.20                  | 1.91 ± 0.19              |
| E4P                      | 0.81 ± 0.08                  | 0.77 ± 0.08              |
| T3P                      | 0.29 ± 0.03                  | 0.28 ± 0.03              |
| 3PG                      | 1.59 ± 0.16                  | 1.51 ± 0.15              |
| PEP                      | 1.17 ± 0.12                  | 1.11 ± 0.11              |
| PYR                      | 6.37 ± 0.64                  | 6.04 ± 0.60              |
| AcCoA                    | 8.43 ± 0.84                  | 7.99 ± 0.80              |
| AKG                      | 2.43 ± 0.24                  | 2.30 ± 0.23              |
| OAA                      | 4.02 ± 0.40                  | 3.81 ± 0.38              |
| Serine                   | 0.46 ± 0.05                  | 0.44 ± 0.04              |
| Glycine                  | 1.31 ± 0.13                  | 1.24 ± 0.12              |
| Fermentation productions |                              |                          |
| Glucose                  | 100.00 ± 0.00                | 100.00 ± 0.00            |
| Lactate                  | 11.78 ± 4.84                 | 11.28 ± 4.25             |
| Succinate                | 5.49 ± 0.81                  | 5.22 ± 1.08              |
| Formate                  | 136.13 ± 4.07                | 136.32 ± 5.01            |
| Acetate                  | 70.90 ± 10.02                | 72.37 ± 13.36            |
| Ethanol                  | 62.86 ± 0.99                 | 60.13 ± 0.18             |
| Acetate/Ethanol*         | 133.77 ± 11.01               | 132.51 ± 13.54           |

4 \*combined flux of acetate and ethanol production



**Table 2.** Selected intracellular fluxes calculated using conventional Metabolic Flux Analysis (c-MFA) and  $^{13}\text{C}$ -based Metabolic Flux Analysis ( $^{13}\text{C}$ -MFA).  $^{13}\text{C}$ -MFA was conducted using either uniformly (U)- $^{13}\text{C}$ -labeled glucose (U- $^{13}\text{C}$ -MFA) or a combination of U- $^{13}\text{C}$ - and 1- $^{13}\text{C}$ -labeled glucose (1-U- $^{13}\text{C}$ -MFA).

| MFA technique<br>Pathway/Reaction            | c-MFA      | $^{13}\text{C}$ -MFA    |                           |                            |                             |                              |
|----------------------------------------------|------------|-------------------------|---------------------------|----------------------------|-----------------------------|------------------------------|
|                                              |            | U- $^{13}\text{C}$ -MFA | 1-U- $^{13}\text{C}$ -MFA | 1-U- $^{13}\text{C}$ -MFA* | 1-U- $^{13}\text{C}$ -MFA** | 1-U- $^{13}\text{C}$ -MFA*** |
| <i>Glucose transport and phosphorylation</i> |            |                         |                           |                            |                             |                              |
| GLU + PEP → G6P + PYR                        | 100.0±0.0  | 100.00±0.00             | 100.00±0.00               | 100.0±0.0                  | 100.0±0.0                   | 100.0±0.00                   |
| <i>Embden-Meyerhof-Parnas</i>                |            |                         |                           |                            |                             |                              |
| G6P → F6P                                    | 55.1±33.7  | 75.7±13.5               | 96.9±1.3                  | 98.4±0.6                   | 97.0±1.7                    | 96.2±1.3                     |
| F6P + ATP → G3P + G3P                        | 83.0±11.2  | 89.8±4.5                | 97.2±0.4                  | 97.6±0.2                   | 96.2±1.6                    | 96.9±0.5                     |
| G3P → PEP + ATP + NADH                       | 175.9±11.2 | 182.7±4.5               | 192.4±0.5                 | 192.7±0.5                  | 191.2±1.7                   | 192.0±0.6                    |
| PEP → PYR + ATP                              | 62.8±11.2  | 71.6±6.2                | 82.8±1.7                  | 78.2±1.8                   | 17.8±21.2                   | 82.1±1.5                     |
| <i>Oxidative pentose phosphate</i>           |            |                         |                           |                            |                             |                              |
| G6P → R5P + CO <sub>2</sub> + 2NAD(P)H       | 44.4±33.7  | 23.9±13.5               | 2.7±1.3                   | 1.2±0.6                    | 1.3±0.7                     | 3.4±1.3                      |
| <i>PEP carboxylation</i>                     |            |                         |                           |                            |                             |                              |
| PEP + CO <sub>2</sub> → OAA                  | 11.9±0.8   | 10.0±2.0                | 6.9±1.5                   | 11.9±1.2                   | 70.6±20.9                   | 7.2±1.6                      |
| <i>Pyruvate dissimilation</i>                |            |                         |                           |                            |                             |                              |
| PYR → AcCoA + Formate                        | 144.8±10.5 | 151.2±8.8               | 167.6±6.3                 | 160.6±6.7                  | 165.±6.8                    | 165.0±4.1                    |
| <i>Fermentation</i>                          |            |                         |                           |                            |                             |                              |
| PYR + NADH → Lactate                         | 11.6±4.6   | 14.0±5.3                | 9.4±4.9                   | 11.5±5.2                   | 13.3±5.0                    | 11.3±4.0                     |
| AcCoA → Acetate + ATP                        | 133.9±10.5 | 135.1±7.2               | 146.3±6.9                 | 149.2±6.9                  | 136.5±7.7                   | 144.4±4.4                    |
| AcCoA + 2NADH → Ethanol                      |            |                         |                           |                            |                             |                              |
| Formate → CO <sub>2</sub> + H <sub>2</sub>   | 8.91±11.21 | 16.5±13.1               | 33.7±12.5                 | 26.5±12.0                  | 28.3±12.4                   | 86.6±44.8                    |
| Formate → Formate <sub>ext</sub>             | 135.9±3.8  | 134.7±11.3              | 133.9±12.4                | 134.1±12.6                 | 137.2±12.8                  | 78.5±45.6                    |
| <i>Carbon dioxide evolution</i>              |            |                         |                           |                            |                             |                              |
| CO <sub>2</sub> → CO <sub>2ext</sub>         | 45.1±24.9  | 35.3±13.9               | 36.4±13.3                 | 19.4±12.4                  | 34.4±13.2                   | 91.1±44.8                    |
| Chi square ( $\chi^2$ )                      | 646        | 652                     | 729.5                     | 681                        | 544.5                       | 651                          |

Estimated fluxes represent the molar percentages of the average specific glucose uptake rates, which were  $29.0 \pm 2.4$  mmol/gCDW/h for c-MFA and U- $^{13}\text{C}$ -MFA, and  $30.7 \pm 2.8$  mmol/gCDW/h for 1-U- $^{13}\text{C}$ -MFA. See nomenclature for abbreviations and Figure 1 for details about pathways. Asterisks indicate the following modifications: \*) the glyoxylate shunt was excluded and the TCA cycle modified to operate as two independent branches, \*\*) the Entner-Doudoroff (ED) pathway and the malic enzyme (ME) were added to the network; and \*\*\*) extracellular measurements were not included in the  $\chi^2$  criterion.

## 1 Literature Cited

1. Stephanopoulos G, Aristidou AA, Nielsen J. *Metabolic Engineering: Principles and Methodology*. San Diego, CA: Academic Press, CA; 1998.
2. Romeo T, Snoep JL. Glycolysis and flux control. In: Böck A, Curtiss R III, Kaper JB, Karp PD, Neidhardt FC, Nyström T, Slauch JM, Squires CL, Ussery D. *EcoSal—Escherichia coli and Salmonella: cellular and molecular biology*. Washington, DC: ASM Press; 2005.
3. Nielsen J. It is all about metabolic fluxes. *J Bacteriol*. 2003;185:7031-7035.
4. Stephanopoulos G. Metabolic fluxes and metabolic engineering. *Metab Eng*. 1999;1:1-11.
5. Klapa MI, Park SM, Sinskey AJ, Stephanopoulos G. Metabolite and isotopomer balancing in the analysis of metabolic cycles: I. Theory. *Biotechnol Bioeng*. 1999;62:375–391.
6. Wiechert W, Möllney M, Petersen S, de Graaf AA. A universal framework for <sup>13</sup>C metabolic flux analysis. *Metab Eng*. 2001;3:265–283.
7. Szyperski T. Biosynthetically directed fractional <sup>13</sup>C-labeling of proteinogenic amino acids: An efficient analytical tool to investigate intermediary metabolism. *Eur J Biochem*. 1995;232:433-448.
8. Grivet JP. NMR for microbiology: In vivo and in situ applications. *Prog Nucl Mag Res Sp*. 2009;54:1-53.
9. Szypreski T, Bailey JE, Wuthrich K. Detecting and dissecting metabolic fluxes using biosynthetic fractional <sup>13</sup>C labeling and two-dimensional NMR spectroscopy. *Trends Biotech*. 1996;14:453-458.

- 1  
2  
3 1 10. Fischer E, Sauer U. Metabolic flux profiling of *Escherichia coli* mutants in central carbon  
4  
5 2 metabolism using GC-MS. *Eur J Biochem.* 2003a;270:880-891.  
6  
7  
8 3 11. Fischer E, Sauer U. Large-scale in vivo flux analysis shows rigidity and suboptimal  
9  
10 4 performance of *Bacillus subtilis* metabolism. *Nat Genet.* 2005;37:636–640.  
11  
12 5 12. Tang YJ, Martin HG, Myers S, Rodriguez S, Baidoo EK, Keasling JD. Advances in  
13 6 analysis of microbial metabolic fluxes via  $^{13}\text{C}$  isotopic labeling. *Mass Spectrom Rev.*  
14 7 2009;28:362–375.  
15  
16  
17 8 13. Emmerling, M., Dauner M, Ponti A, Fiaux J, Hochuli M, Szyperski T, Wuthrich K,  
18 9 Bailey JE, Sauer U. Metabolic flux responses to pyruvate kinase knockout in *Escherichia*  
19 10 *coli*. *J Bacteriol.* 2002;184:152-164.  
20  
21  
22 11 14. Al Zaid Siddiquee K, Arauzo-Bravo MJ, Shimizu K. Metabolic flux analysis of *pykF*  
23 12 gene knockout *Escherichia coli* based on  $^{13}\text{C}$ -labeling experiments together with  
24 13 measurements of enzyme activities and intracellular metabolite concentrations. *Appl*  
25 14 *Microbiol Biotechnol.* 2004;63:407–417.  
26  
27 15 15. Zhao J, Shimizu K. Metabolic flux analysis of *Escherichia coli* K12 grown on  $^{13}\text{C}$ -  
28 16 labeled acetate and glucose using GC-MS and powerful flux calculation method. *J*  
29 17 *Biotechnol.* 2003;101:101–117.  
30  
31  
32 18 16. Schuetz R, Kuepfer L, Sauer U. Systematic evaluation of objective functions for  
33 19 predicting intracellular fluxes in *Escherichia coli*. *Mol Syst Biol.* 2007;3:119.  
34  
35  
36 20 17. Sauer U, Lasko DR, Fiaux J, Hochuli M, Glaser R, Szyperski T, Wuthrich K, Bailey JE.  
37 21 Metabolic flux ratio analysis of genetic and environmental modulations of *Escherichia*  
38 22 *coli* central carbon metabolism. *J Bacteriol.* 1999;181:6679–6688.  
39  
40  
41  
42  
43  
44  
45  
46  
47  
48  
49  
50  
51  
52  
53  
54  
55  
56  
57  
58  
59  
60

- 1  
2  
3 1 18. Sauer U, Canonaco F, Heri S, Perrenoud A, Fischer E. The soluble and membrane-bound  
4  
5 2 transhydrogenases UdhA and PntAB have divergent functions in NADPH metabolism of  
6  
7 3  
8 *Escherichia coli*. *J Biol Chem*. 2004;279:6613–6619.  
9  
10 4  
11 19. Nanchen A, Schicker A, Sauer U. Nonlinear dependency of intracellular fluxes on growth  
12  
13 5 rate in miniaturized continuous cultures of *Escherichia coli*. *Appl Environ Microbiol*.  
14  
15 6 2006; 72:1164–1172.  
16  
17 7  
18 20. Fong SS, Nanchen A, Palsson BO, Sauer U. Latent pathway activation and increased  
19  
20 8 pathway capacity enable *Escherichia coli* adaptation to loss of key metabolic enzymes. *J*  
21  
22 9 *Biol Chem*. 2006;281:8024–8033.  
23  
24 10  
25 21. Suthers PF, Burgard AP, Dasika MS, Nowroozi F, Van Dien S, Keasling JD, Maranas  
26  
27 11 CD. Metabolic flux elucidation for large-scale models using <sup>13</sup>C labeled isotopes. *Metab*  
28  
29 12 *Eng*. 2007;9:387–405.  
30  
31 13  
32 22. Fischer E, Sauer U. A novel metabolic cycle catalyzes glucose oxidation and anaplerosis  
33  
34 14 in hungry *Escherichia coli*. *J Biol Chem*. 2003b;278:46446-46451.  
35  
36 15  
37 23. Schmidt K, Nielsen J, Villadsen J. Quantitative analysis of metabolite fluxes in  
38  
39 16 *Escherichia coli*, using two-dimensional NMR spectroscopy and complete isotopomer  
40  
41 17 models. *J Biotechnol*. 1999a;71:175-190.  
42  
43 18  
44 24. Ingraham JL, Maaloe O. and Neidhardt FC. *Growth of the Bacterial Cell*. Sunderland,  
45  
46 19 MA: Sinauer Associates; 1983.  
47  
48 20  
49 25. Neidhardt FC, Bloch PL, Smith DF. Culture Medium for Enterobacteria. *J Bacteriol*.  
50  
51 21 1974;119:736-747.  
52  
53 22  
54 26. Szypreski T. <sup>13</sup>C-NMR, MS and metabolic flux balancing in biotechnology research. *Q*  
55  
56 23 *Rev Biophys*. 1998;31:41-106.  
57  
58  
59  
60

- 1  
2  
3 1 27. Johnson BA, Blevins RA. NMRView: a computer program for the visualization and  
4  
5 2 analysis of NMR data. *J Biomol NMR*. 1994;4:603-614.  
6  
7  
8 3 28. Sriram G, Fulton DB, Shanks JV. Flux quantification in central carbon metabolism of  
9  
10 4 *Catharanthus roseus* hairy roots by C-13 labeling and comprehensive bondomer  
11  
12 5 balancing. *Phytochemistry*. 2007;68:2243-2257.  
13  
14  
15 6 29. Van Winden W, Schipper D, Verheijen P, Heijnen J. Innovations in generation and  
16  
17 7 analysis of 2D [<sup>13</sup>C,<sup>1</sup>H] COSY NMR spectra for metabolic flux analysis purposes. *Metab*  
18  
19 8 *Eng*. 2001;3:322-343.  
20  
21  
22 9 30. Sriram G, Fulton DB, Iyer VV, Peterson JM, Zhou R, Westgate ME, Spalding MH,  
23  
24 10 Shanks JV. Quantification of compartmented metabolic fluxes in developing soybean  
25  
26 11 embryos by employing biosynthetically directed fractional <sup>13</sup>C labeling, two-dimensional  
27  
28 12 [<sup>13</sup>C, <sup>1</sup>H] nuclear magnetic resonance, and comprehensive isotopomer balancing. *Plant*  
29  
30 13 *Physiol*. 2004;136:3043-3057.  
31  
32  
33  
34 14 31. Press WH, Teukolsky SA, Vetterling WT, Flannery BP. *Numerical Recipes in C: The Art*  
35  
36 15 *of Scientific Computing* (2nd edition). Cambridge, UK: Cambridge University Press;  
37  
38 16 1992.  
39  
40  
41 17 32. Arauzo-Bravo MJ, Shimizu K. An improved method for statistical analysis of metabolic  
42  
43 18 flux analysis using isotopomer mapping matrices with analytical expressions. *J*  
44  
45 19 *Biotechnol*. 2003;105:117-133.  
46  
47  
48 20 33. Mollney M, Wiechert W, Kownatzki D, de Graaf AA. Bidirectional reaction steps in  
49  
50 21 metabolic networks: IV. Optimal design of isotopomer labeling experiments. *Biotechnol*  
51  
52 22 *Bioeng*. 2006;66:86-103  
53  
54  
55  
56  
57  
58  
59  
60

- 1  
2  
3 1 34. Sawers RG, Clark DP. Fermentative pyruvate and acetyl-coenzyme A metabolism. In:  
4  
5 2 Böck A, Curtiss R III, Kaper JB, Karp PD, Neidhardt FC, Nyström T, Slauch JM, Squires  
6  
7 3 CL, Ussery D. *EcoSal—Escherichia coli and Salmonella: cellular and molecular biology.*  
8  
9 4 Washington, D.C: ASM press; 2004.  
10  
11  
12 5 35. Sawers RG, Blokesch M, Bock A. Anaerobic formate and hydrogen metabolism. In:  
13  
14 6 Böck A, Curtiss R III, Kaper JB, Karp PD, Neidhardt FC, Nyström T, Slauch JM, Squires  
15  
16 7 CL, Ussery D. *EcoSal—Escherichia coli and Salmonella: cellular and molecular biology.*  
17  
18 8 Washington, D.C: ASM press; 2004.  
19  
20  
21 9 36. Cozzone AJ. Regulation of acetate metabolism by protein phosphorylation in enteric  
22  
23 10 bacteria. *Annu Rev Microbiol.* 1998;52:127–164.  
24  
25  
26 11 37. Harris RK. *Nuclear Magnetic Resonance Spectroscopy: A Physicochemical View.*  
27  
28 12 London: Pitman Books; 1983.  
29  
30  
31 13 38. Phue JN, Shiloach J. Transcription levels of key metabolic genes are the cause for  
32  
33 14 different glucose utilization pathways in *E. coli* B (BL21) and *E. coli* K (JM109). *J*  
34  
35 15 *Biotechnol.* 2004;109:21–30.  
36  
37  
38 16 39. Van de Walle M, Shiloach J. Proposed mechanism of acetate accumulation in two  
39  
40 17 recombinant *Escherichia coli* strains during high density fermentation. *Biotechnol*  
41  
42 18 *Bioeng.* 1998;57:71-78.  
43  
44  
45 19 40. Dauner M, Bailey JE, Sauer U. Metabolic flux analysis with a comprehensive isotopomer  
46  
47 20 model in *Bacillus subtilis*. *Biotechnol Bioeng.* 2000;76:144-156.  
48  
49  
50 21 41. Schmidt K, Norregaard LC, Pedersen B, Meissner A, Duus J, Nielsen J, Villadsen J.  
51  
52 22 Quantification of intracellular metabolic fluxes from fractional enrichment  $^{13}\text{C}$ - $^{13}\text{C}$   
53  
54  
55  
56  
57  
58  
59  
60

- 1  
2  
3 1 coupling constraints on the isotopomer distribution in labeled biomass components.  
4  
5  
6 2 *Metab Eng.* 1999b;1:166-179.  
7  
8 3 42. Fischer E, Zamboni N, Sauer U. High-throughput metabolic flux analysis based on gas  
9  
10 4 chromatography-mass spectrometry derived  $^{13}\text{C}$  constraints. *Anal Biochem.*  
11  
12 5 2004;325:308-316.  
13  
14  
15 6  
16  
17  
18  
19  
20  
21  
22  
23  
24  
25  
26  
27  
28  
29  
30  
31  
32  
33  
34  
35  
36  
37  
38  
39  
40  
41  
42  
43  
44  
45  
46  
47  
48  
49  
50  
51  
52  
53  
54  
55  
56  
57  
58  
59  
60

For Peer Review

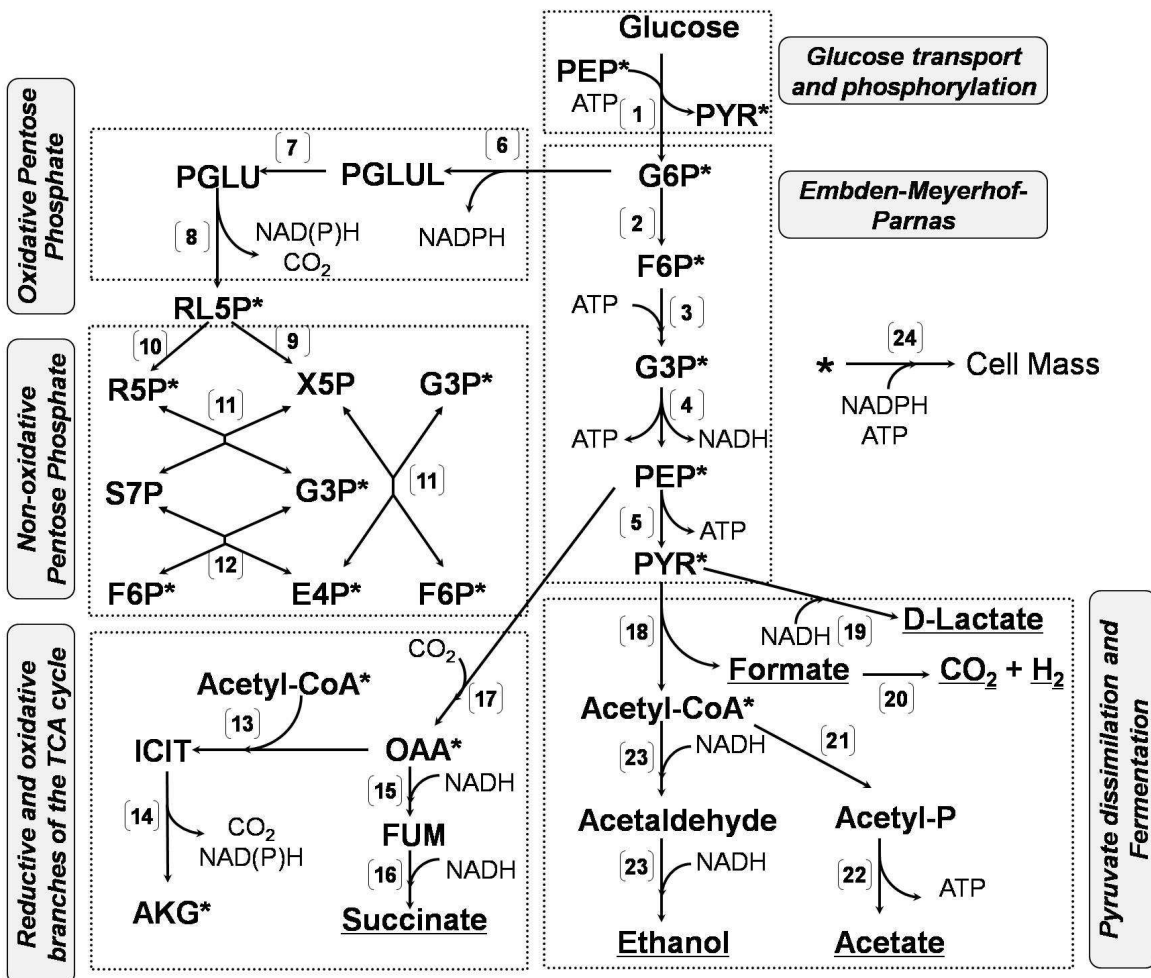

Figure 1.



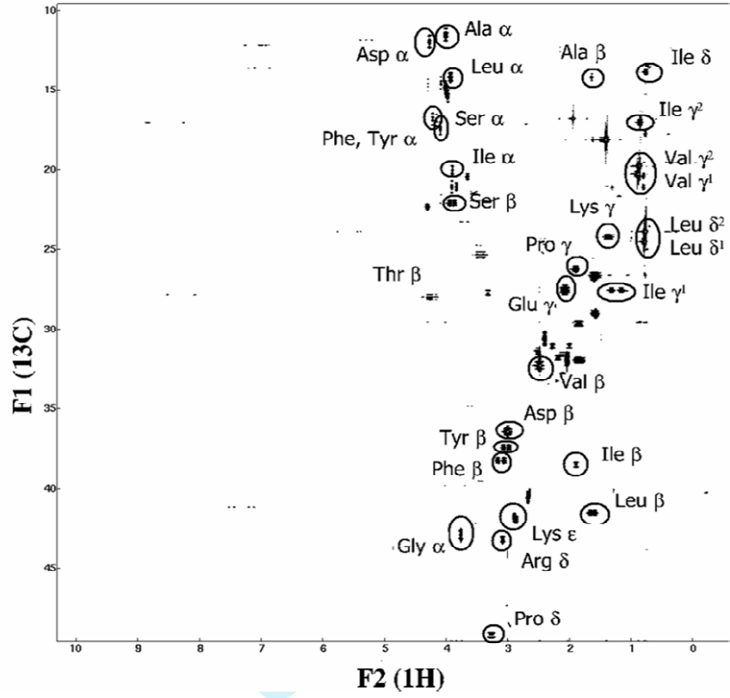

(A)

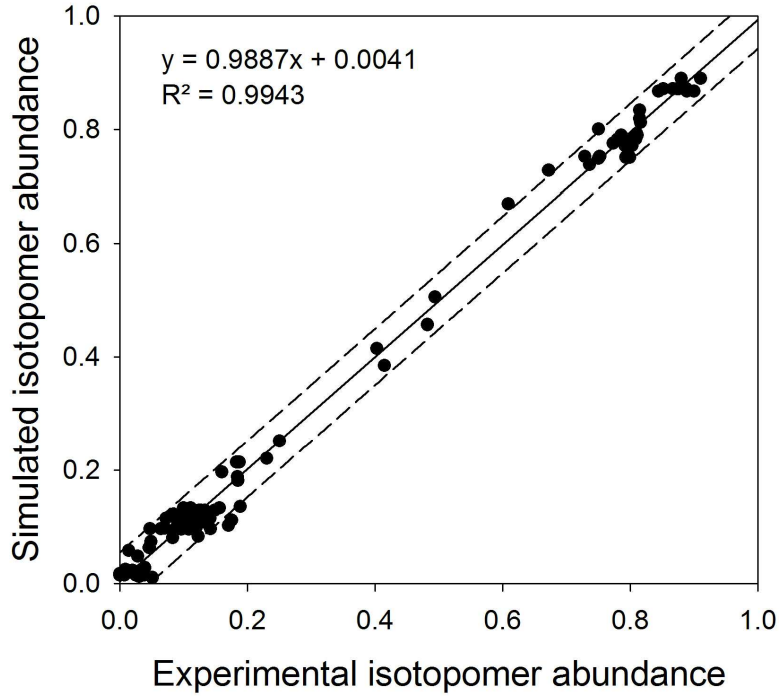

(B)

Figure 2.

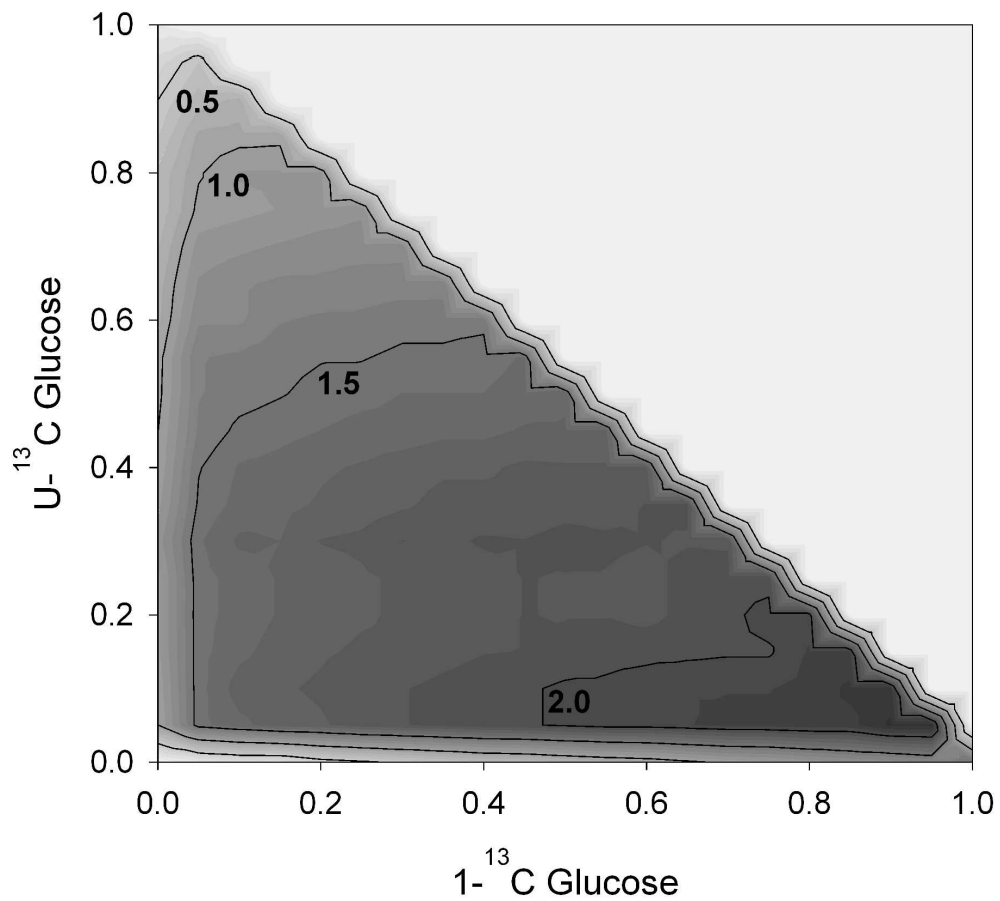

Figure 3.

1  
2  
3  
4  
5  
6  
7  
8  
9  
10  
11  
12  
13  
14  
15  
16  
17  
18  
19  
20  
21  
22  
23  
24  
25  
26  
27  
28  
29  
30  
31  
32  
33  
34  
35  
36  
37  
38  
39  
40  
41  
42  
43  
44  
45  
46  
47  
48  
49  
50  
51  
52  
53  
54  
55  
56  
57  
58  
59  
60

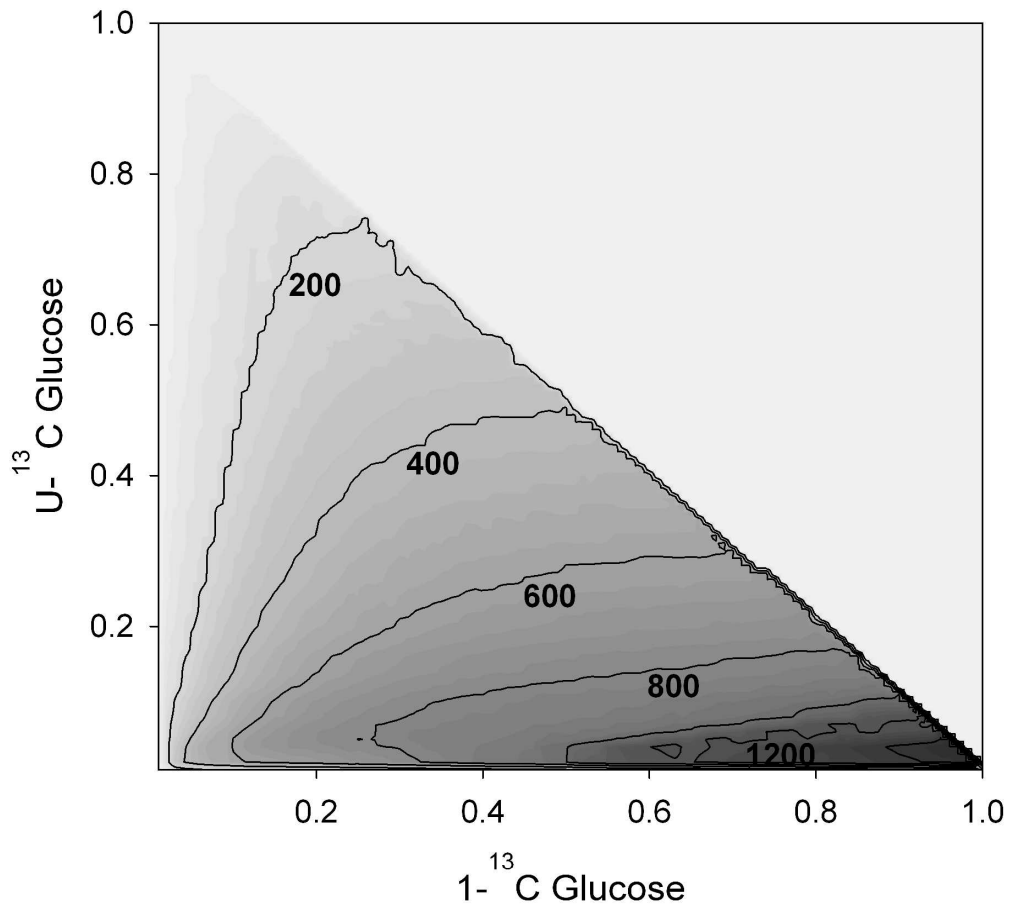

Figure 4.

view

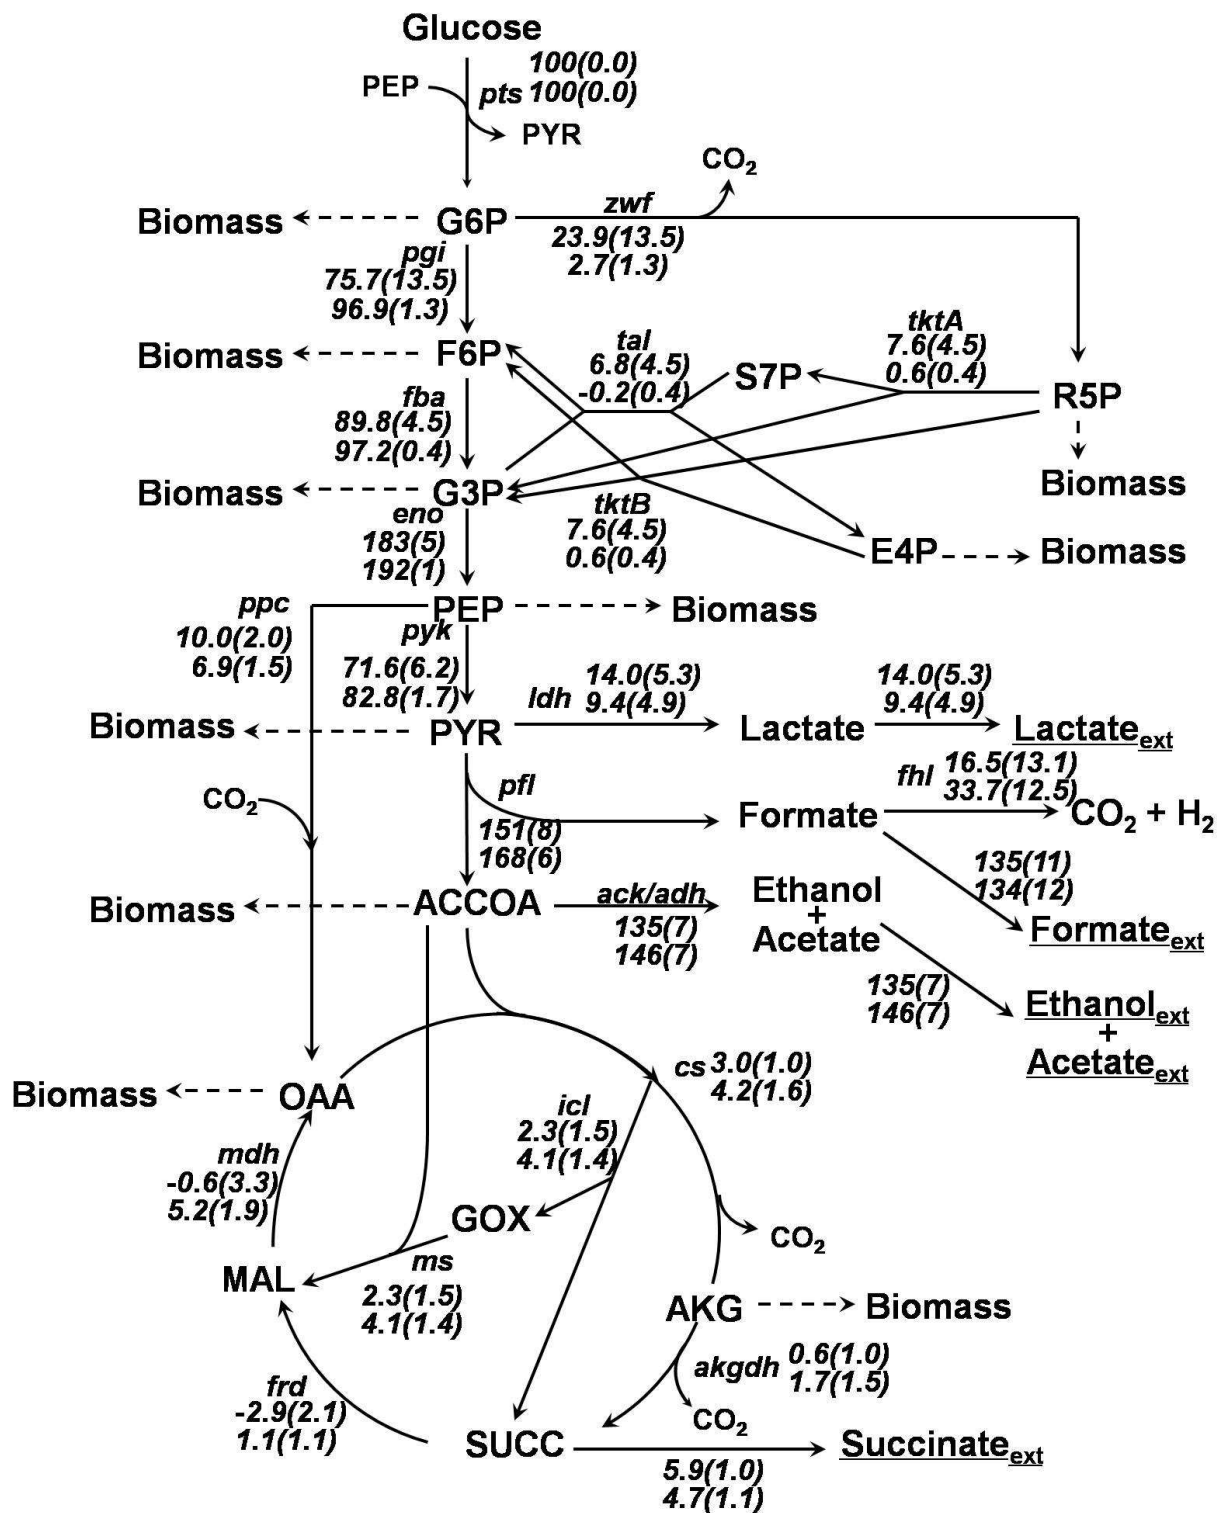

Figure 5.

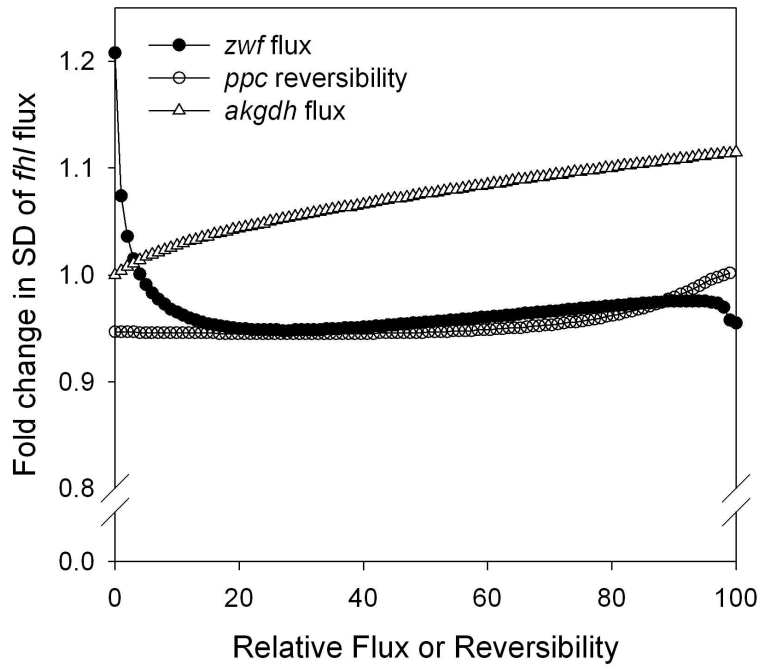

(A)

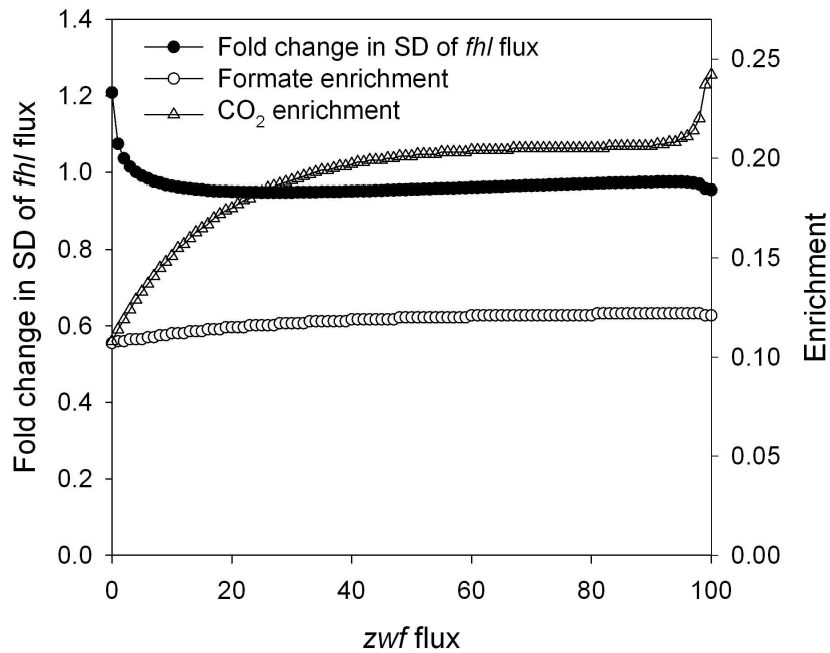

(B)

Figure 6.
